1           **NF- $\kappa$ B-repressed Sirt3 mediates testicular cholesterol metabolism and**  
2           **cytoskeleton assembly via P450scc/SOD2 deacetylation during spermatogenesis**

3           Mei Wang<sup>1,2,3</sup>, Ling Zeng<sup>4</sup>, Yao Xiong<sup>1</sup>, Xiao-fei Wang<sup>4</sup>, Lin Cheng<sup>1,3</sup>, Fang Wang<sup>3</sup>,  
4                               Ping Su<sup>4\*</sup>, Yuan-zhen Zhang<sup>1,3\*</sup>

5           <sup>1</sup> Reproductive Medicine Center, Zhongnan Hospital of Wuhan University, Wuhan  
6           430071, Hubei, P.R. China

7           <sup>2</sup> Harvard-MGH Center for Reproductive Medicine and Reproductive Endocrine Unit,  
8           Department of Medicine, Massachusetts General Hospital, Harvard Medical School,  
9           Boston, MA 02114, USA

10          <sup>3</sup> Clinical Medicine Research Center of Prenatal Diagnosis and Birth Health in Hubei  
11          Province, Wuhan 430071, Hubei, P.R. China

12          <sup>4</sup> Institute of Reproductive Health, Tongji Medical College, Huazhong University of  
13          Science and Technology, Wuhan 430030, Hubei, P.R. China

14

15          **Running head:** SIRT3 during spermatogenesis

16          **First Author:** Mei Wang: wangmei1990@whu.edu.cn; mwang41@mgh.harvard.edu;

17          \* **indicates corresponding authors**

18          **First corresponding author:** Yuan-zhen Zhang: zhangyuanzhen@whu.edu.cn;  
19          [yuanzhenzhangvip@163.com](mailto:yuanzhenzhangvip@163.com);

20          Orcid ID: 0000-0003-0437-423X

21          **Second corresponding author:** Ping Su: suping24@mails.tjmu.edu.cn;

22          **Co-authors:** Ling Zeng: zlhkjd@163.com; Yao Xiong: 476583872@qq.com;

23          Xiao-fei Wang: 753534762@qq.com; Lin Cheng: 512334626@qq.com; Fang Wang:  
24          wonfun@whu.edu.cn;

25

26

27

28 **Abstract**

29 Testicular homeostasis requires the balanced interplay between specific molecules in  
30 Sertoli cells, Leydig cells, germ cells. Loss of this coordination can lead to the  
31 disruption of spermatogenesis, even male infertility. By operating the upregulation  
32 and downregulation of Sirt3 in our male subfertility rats model and two testicular cells  
33 models, we indicated that Sirt3 overexpression and activator ameliorated cholesterol  
34 metabolism via P450scc deacetylation in Leydig cells, and cytoskeleton assembly via  
35 PDLIM1 with SOD2 deacetylation in Sertoli cells and elongating spermatids. In terms  
36 of the upstream regulator of Sirt3, the phosphorylation of NF- $\kappa$ B p65<sup>Ser536</sup> stimulated  
37 the nuclear translocation of NF- $\kappa$ B subunits (p50, p65, RelB), which bound to TFBS1  
38 and TFBS2 synchronously in the promoter of Sirt3, repressing Sirt3 transcription.  
39 This study demonstrates that NF- $\kappa$ B-repressed SIRT3 acts directly on cholesterol  
40 metabolism of Leydig cells and cytoskeleton assembly of Sertoli cells via  
41 P450scc/SOD2 deacetylation to regulate sperm differentiation, influencing  
42 spermatogenesis, even male fertility.

43

44 **Research organism: Rat, mouse**

45

46 **Key words:** SIRT3; Spermatogenesis; Cholesterol metabolism; Cytoskeleton  
47 assembly; NF- $\kappa$ B; P450scc/SOD2 deacetylation

48

## 49 **Introduction**

50 Spermatogenesis is a well-defined dynamic process that consists of spermatogonial  
51 mitosis, spermatocytic meiosis and spermiogenesis (Griswold, 2016). During this  
52 highly specialized process, Sertoli cells provide structural and energy support for  
53 germ cells differentiation, growth and spermiation (Yokonishi et al., 2020); Leydig  
54 cells transform cholesterol to produce testosterone (Li et al., 2016), which is required  
55 for meiosis (Deng et al., 2016), releasing mature sperm (O'Donnell et al., 2009),  
56 maintaining blood–testis barrier (BTB) (Mruk and Cheng, 2015). Ectoplasmic  
57 specialization (ES), as an actin microfilament-rich anchoring device, comprises  
58 Sertoli-elongating spermatid interface (apical ES) and Sertoli-Sertoli cell interface  
59 (basal ES) (Mruk and Cheng, 2015). The apical ES interacts with the acrosome,  
60 reshaping the sperm head, facilitating spermatid morphology and spermiation; the  
61 basal ES with the tight/gap junctions constitutes BTB, protecting from external  
62 stimulus (Cheng and Mruk, 2012). Except for ES, the microtubule is also a vital  
63 cytoskeleton component. In fact, the function of Sertoli cells in nourishing the  
64 developing spermatozoa depends on Leydig cells-secreted testosterone (Makela et al.,  
65 2019), providing a communication network in testis. Thus, loss of this coordination  
66 can lead to the disruption of spermatogenesis, even male infertility.

67 Sirtuin 3 (SIRT3) is the primary mitochondrial acetyl-lysine deacetylase that  
68 modulates various proteins for mitochondrial function, ROS generation, cell death  
69 (Pellegrini et al., 2012) and metabolism (Hor et al., 2020; Palomer et al., 2020).  
70 SIRT3 cooperates with SIRT1, targeting PGC-1 $\alpha$  in antioxidant defense systems  
71 (Chen et al., 2018b). Sirt1 deficiency in mice leads to spermatogenesis derangement  
72 via meiotic arrest (Heo et al., 2017) and acrosome biogenesis disruption by autophagy  
73 (Liu et al., 2017a). Despite the high expression of SIRT3 in mammalian testis (Yu et  
74 al., 2014; Yue et al., 2014), the role of SIRT3 in testis remains ambiguous. Our  
75 previous study has evidenced that testicular cell injury induced by cadmium (Cd) in  
76 rats is associated with mitochondrial autophagy and oxidative stress (Wang et al.,  
77 2020). Then, a question appears: whether manipulating Sirt3 can also regulate  
78 testicular injury induced by Cd? Even, what's the functional role of Sirt3 in testis?

79        Herein, our male subfertility model indicated that SIRT3 activator melatonin (Mel)  
80 rescued cholesterol metabolism (and testosterone biosynthesis) by Abca1, Hsd17b3,  
81 Scap, Srebf2, Star and F-actin-containing cytoskeleton assembly by ectoplasmic  
82 specialization and microtubule-based manchette during spermiogenesis, facilitating  
83 sperm motility and count in Cd-treated rat testis. The expression of testosterone  
84 biosynthesis-associated markers (NF- $\kappa$ B p65 and P450scc) and cytoskeleton markers  
85 (PDLIM1, SOD2), especially SIRT3 presented responsive changes. Further,  
86 generating Sirt3 knockdown/overexpression models in TM3 (mouse Leydig) cells and  
87 TM4 (mouse Sertoli) cells respectively, we found that like Mel, Sirt3 overexpression  
88 ameliorated cholesterol metabolism (and testosterone biosynthesis) via P450scc  
89 deacetylation in Cd-treated TM3 cells and cytoskeleton assembly via PDLIM1 with  
90 SOD2 deacetylation in Cd-treated TM4 cells. Sirt3 knockdown-induced cell  
91 disruption failed to be salvaged by Mel. In terms of the upstream regulator of SIRT3,  
92 phosphorylation of NF- $\kappa$ B p65<sup>Ser536</sup> stimulated the nuclear translocation of NF- $\kappa$ B  
93 subunits (p50, p65, RelB), which bound to TFBS1 and TFBS2 in the promoter of  
94 Sirt3 synchronously, repressing Sirt3 transcription. Collectively, this study  
95 demonstrates the novel role of SIRT3 in testicular cells: **Sirt3 transcriptional**  
96 **repression by NF- $\kappa$ B orchestrates cholesterol metabolism via P450scc**  
97 **deacetylation in Leydig cells; whereas, in Sertoli cells, SIRT3 regulates**  
98 **cytoskeleton assembly via PDLIM1 with SOD2 deacetylation, facilitating sperm**  
99 **differentiation during spermiogenesis.** Our findings shed light on the multi-faceted  
100 action of SIRT3 and establish a novel signaling network in the crosstalk between  
101 testicular different cells. Understanding the role of SIRT3 in cholesterol metabolism  
102 and cytoskeleton assembly will contribute to the development of spermatogenesis.  
103 SIRT3 may serve as a potential therapeutic target for spermatogenesis disorganization,  
104 male infertility, even other metabolic diseases.

105

## 106 **Results**

### 107 **SIRT3 activator Mel rescues male reproductive function injury induced by Cd in** 108 **adult rats, including cholesterol metabolism and structure disruptions**

109 To investigate whether SIRT3 was involved in the testicular function, we first  
110 examined the effects of SIRT3 activator Mel by a previous subfertility model in

111 Cd-treated adult male SD rats. Results showed that Mel significantly reversed sperm  
112 count, sperm motility, serum testosterone reduction induced by Cd (**Fig. 1a-c**). The  
113 concentration of Cd in the testis was apparently reduced by Mel (**Fig. 1d**). Like other  
114 steroid hormones, testosterone was biosynthesized from cholesterol, so we explored  
115 the levels of serum total cholesterol (TC) and free cholesterol (FC). Interestingly, Cd  
116 provoked the augment of serum TC and FC rather than the decline of those, but Mel  
117 overturned the above changes (**Fig. 1e, f**).

118 To elucidate the reason, we checked cholesterol metabolism markers, including a  
119 series of steroidogenic enzymes, which are responsible for testosterone biosynthesis.  
120 Cd suppressed the expression of cholesterol efflux marker Abca1, which was reversed  
121 by Mel (**Fig. 1g**), suggesting that Mel could regulate cholesterol efflux blocked by Cd  
122 in testicular cells. Cholesterol biosynthesis markers Hmgcr and Hmgcs1 (Luo et al.,  
123 2020) didn't present any differences in Cd with or without Mel group when compared  
124 to the control group (**Fig. 1g**), indicating that whether Cd or Mel was independently  
125 associated with cholesterol biosynthesis in the testis. Besides, the expression of Star, a  
126 key transporter of cholesterol from cytoplasm into the mitochondria for testosterone  
127 biosynthesis (Rubinow, 2018), was dramatically increased in Cd-treated group, and  
128 Mel reversed the augment of Star in the testis (**Fig. 1g**). As predicted, more cholesterol  
129 could be delivered into the mitochondria, and then produced more testosterone in  
130 Cd-treated group. Nonetheless, the fact was that Cd diminished testosterone production.  
131 Given that Scap/SREBP system was sensitive to the concentration of cholesterol in the  
132 plasma membrane and regulated genes transcription of cholesterol metabolism (Das et  
133 al., 2014), we subsequently inspected the expression of Scap and Srebf2, which were  
134 significantly dwindled in Cd-treated group and raised back in Cd with Mel group (**Fig.**  
135 **1g**). Hsd17b3, as an indispensable enzyme for testosterone biosynthesis, specifically  
136 catalyzed the conversion of androstenedione to testosterone (Marshall et al., 2002). Mel  
137 salvaged the reduction of Hsd17b3 expression induced by Cd (**Fig. 1g**). Above results  
138 revealed that SIRT3 activator Mel rescued cholesterol metabolism disruption in male  
139 subfertility model induced by Cd.

140 Mel decreased the morphologic damage of the seminiferous tubules was decreased  
141 by Mel. As depicted in **Fig. 1h**, testicular cells in Cd-treated group were arranged  
142 loosely with a large number of voids (**Fig. 1h (Bb)**), while whether the control group or  
143 Cd with Mel group exhibited an intact and dense lumen structure (**Fig. 1h (Aa, Cc)**).

144 For further exploring which of testicular cells were affected in this study, we analyzed  
145 the ultrastructure of the testis by transmission electron microscopy (TEM). Both Sertoli  
146 cells and Leydig cells presented complete nuclear membrane structure, and normal  
147 organelles (such as mitochondria, endoplasmic reticulum) with a low number of  
148 lysosomes in the control group (**Fig. 1i (Aa), j (Aa)**). By contrast, Cd apparently  
149 induced lots of lysosomes, autophagosomes and enormous autophagolysosomes in  
150 Sertoli cells (**Fig. 1i (Bb)**), which were consistent with autophagy observed in previous  
151 study (Wang et al., 2020). However, Cd with Mel group showed nearly normal  
152 organelles with sporadic autophagosomes, and tiny black unidentified objects  
153 (probably Cd) (**Fig. 1i (Cc)**). In Leydig cells, Cd evoked massive cytoplasmic  
154 vacuolization, while Mel obviously protected against the abnormal ultrastructure  
155 induced by Cd (**Fig. 1j (Bb, Cc)**). Given that Leydig cells were the primary source of  
156 testosterone production (Makela et al., 2019), the ultrastructural changes in Leydig  
157 cells corresponded to above cholesterol metabolism and testosterone biosynthesis  
158 regulation. Our previous study indicated that Cd disturbed BTB via oxidative stress  
159 (Chen et al., 2018a), so we asked whether Mel could protect from BTB injury. The  
160 basal ES and other junctions constituted the BTB between adjacent Sertoli cells. The  
161 control group exhibited adjacent Sertoli cells and normal basal ES with the actin  
162 bundles; Cd disrupted the basal ES and actin bundles with large vacuoles (asterisks),  
163 but Mel rescued BTB disruption induced by Cd (**Fig. 1k**). Actually, the disruption of  
164 BTB led to germ cell loss and male infertility (Cheng and Mruk, 2012), which might  
165 account for sperm count reduction.



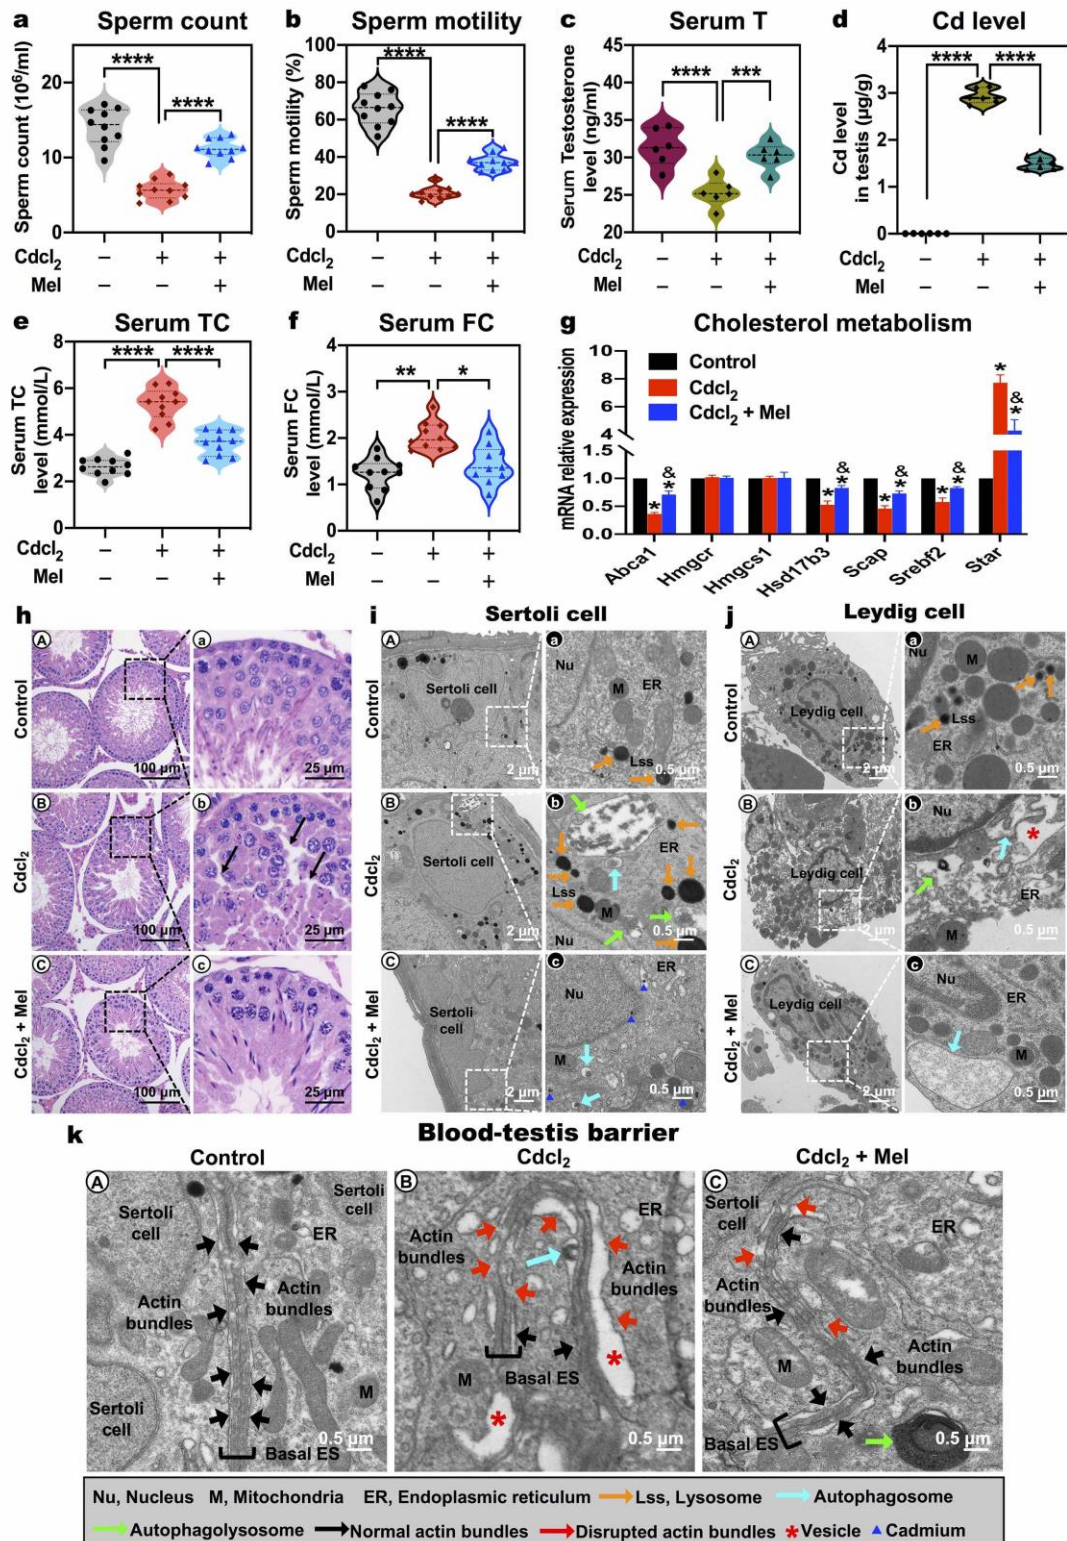

166

167 **Fig. 1 SIRT3 activator Mel rescues male reproductive function injury induced by**  
 168 **Cd in adult rats, including cholesterol metabolism and structure disruptions. a**  
 169 **Sperm count. b Sperm motility. c Serum testosterone (T) level. d Cadmium (Cd) level**  
 170 **in testis. e Serum total cholesterol (TC) level. f Serum free cholesterol (FC) level. g**

171 mRNA expression levels of cholesterol metabolism markers of *Abca1*, *Hmgcr*,  
172 *Hmgcs1*, *Hsd17b1*, *Scap*, *Srebf2*, *Star* in testis. **h** Histological results of the testis in  
173 rats. **i-k** Representative transmission electron micrographs (TEM) depicting the  
174 ultrastructure of Sertoli cell, Leydig cell, blood-testis barrier (BTB) in testis. Areas for  
175 the cell in the left column (Scale bar, 2  $\mu$ m) have been shown for further details in the  
176 right column (Scale bar, 0.5  $\mu$ m) in **i** and **j**. Nu, nucleus; M, mitochondria; ER,  
177 endoplasmic reticulum; orange arrowheads indicate lysosome; turquoise arrowheads  
178 indicate autophagosome; spring arrowheads indicate autophagolysosome; black  
179 arrowheads indicate normal actin bundles in BTB; red arrowheads indicate disrupted  
180 actin bundles in BTB; red asterisk indicates vesicle; blueberry triangles indicate  
181 potential Cd in testis. \* $p < 0.05$ ; \*\* $p < 0.01$ ; \*\*\* $p < 0.001$ ; \*\*\*\* $p < 0.0001$  in **a-f**. \* $p <$   
182  $0.05$  compared with the control. & $p < 0.05$  compared with the Cd-treated group in **g**.

183

184 Above results proved that Mel regulated Sertoli cells, Leydig cells and BTB,  
185 intimating that SIRT3 might engage in cholesterol metabolism and testosterone  
186 synthesis by Leydig cells, and affect sperm count by BTB and Sertoli cells.

187

188 **SIRT3 activator Mel rescues cytoskeleton (apical ES and microtubule-based**  
189 **manchette) assembly disruption induced by Cd in the elongating spermatid**  
190 **during spermiogenesis**

191 Except for sperm count, Mel rescued sperm motility reduction induced by Cd (**Fig. 1b**).  
192 The cytoskeleton assembly of apical ES and microtubule-based manchette in sperm  
193 head and flagellum during spermiogenesis, is required for sperm motility acquirement  
194 (Pleuger et al., 2020). To test the hypothesis if SIRT3 activator Mel protects sperm  
195 motility by regulating cytoskeleton assembly, we screened the spermatid deformation  
196 process step by step during spermiogenesis through TEM analysis.

197 Spermiogenesis begins with round spermatid elongation at step 8, so our  
198 observation started from this stage. There were no significant differences between Cd  
199 with or without Mel group and the control group at step 8 (**Fig. 2a (A-C)**). From step  
200 9 to 10, bundles of microtubules were assembled to form the manchette structure  
201 (black arrow), which was tightly arranged in different groups (**Fig. 2a (D2-F2)**). The  
202 apical ES (white arrow), an imperative component for shaping sperm head, was  
203 constituted by actin bundles surrounding the acrosome's outer layer. We found that



204 the sperm head was disturbed with large vacuoles (red asterisk) in Cd-treated group,  
205 but Mel reversed the disruption of apical ES and acrosome induced by Cd (**Fig. 2a**  
206 **(D1-F1)**). In the early elongating spermatids of step 10-11, a well-assembled sperm  
207 head and long microtubule-based manchette could be observed in the control group  
208 (**Fig. 2a (G)**); whereas, in the Cd-treated group, apical ES disappeared with large  
209 vacuoles in sperm head, and the manchette was undermined with short microtubules  
210 (red arrow) (**Fig. 2a (H)**); however, in Cd with Mel group, apical ES and manchette  
211 were slightly impaired (**Fig. 2a (I)**). In the late elongating spermatids of steps 14 to 15,  
212 well assembled apical ES and acrosome were finely arranged surrounding the  
213 condensed nucleus, and the long manchette could be detected clearly (**Fig. 2a (J)**);  
214 instead, in Cd-treated group, gigantic vacuoles replaced the well apical ES, only  
215 round dots (red arrow) rather than long microtubules were observed (**Fig. 2a (K)**); yet  
216 Cd with Mel group presented slightly apical ES and manchette injury (**Fig. 2a (L)**).  
217 Besides, flagella axonemes (yellow arrow), which were associated with sperm  
218 motility, were identified. We did not discover any differences in axoneme between  
219 three groups, only with some autophagosomes around the axoneme in Cd-treated  
220 group (**Fig. 2a (M-O)**). Ultrastructural results displayed that Mel could extricate  
221 apical ES and manchette injury caused by Cd.

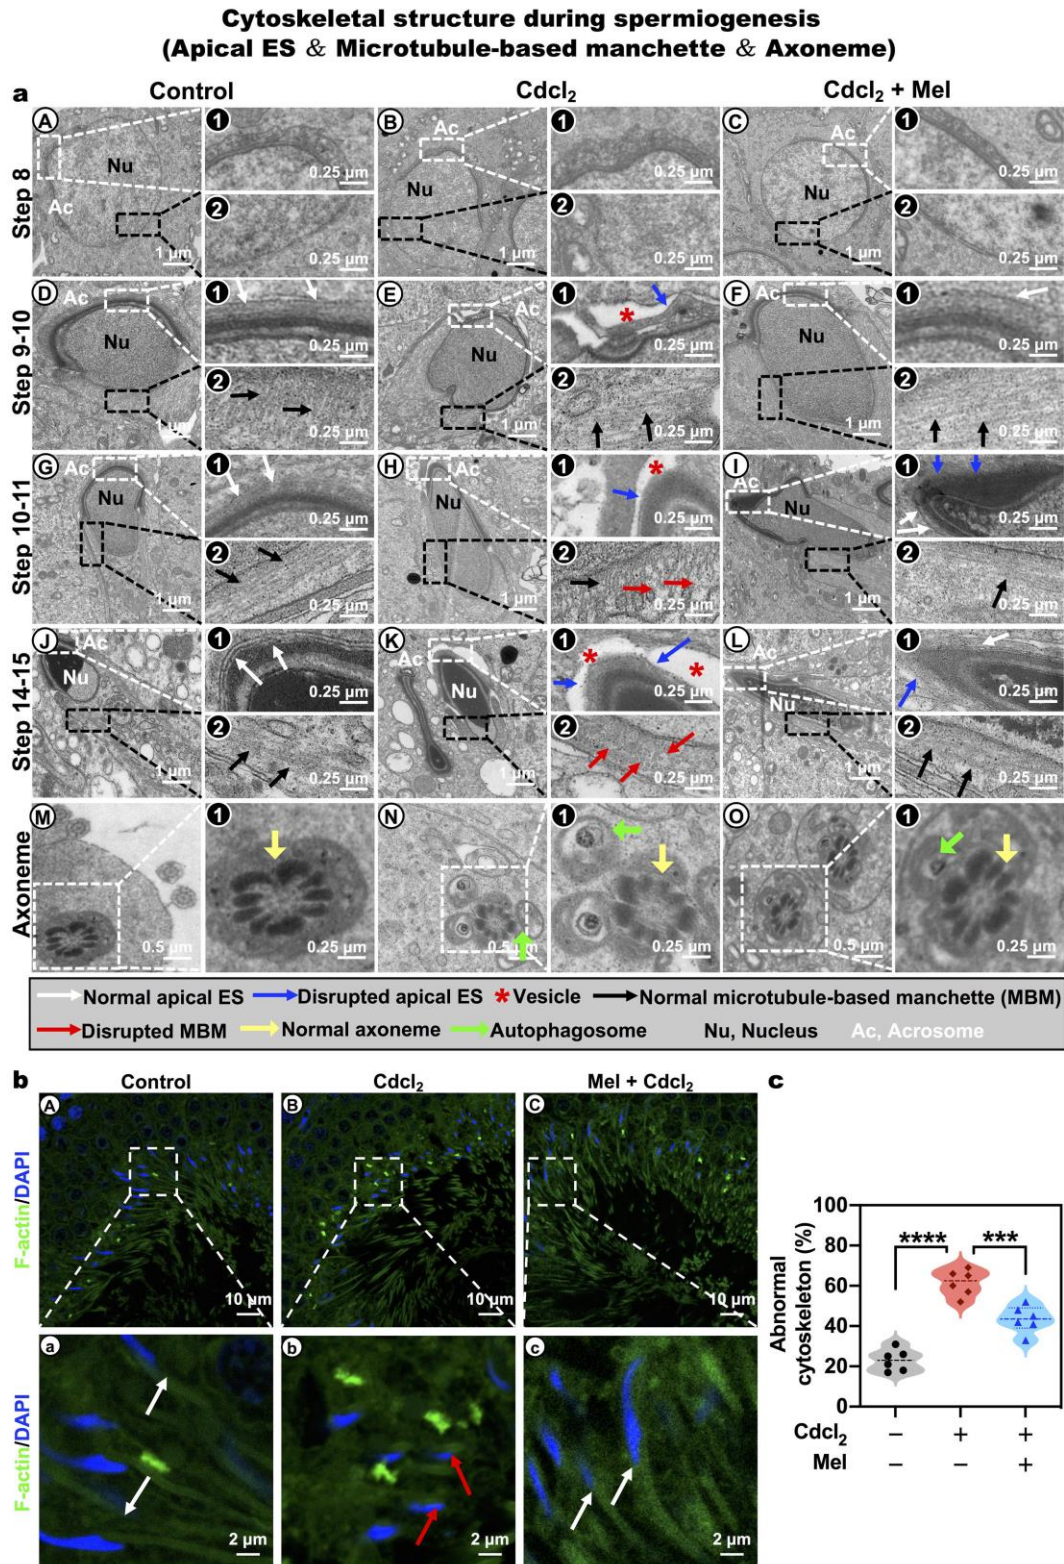

222

223 **Fig. 2 SIRT3 activator Mel rescues spermatid cytoskeleton (apical ES and**  
 224 **microtubule-based manchette) assembly disruption induced by Cd during**  
 225 **spermiogenesis. a** Ultrastructural analysis of the spermiogenesis in rat testis during  
 226 different developmental stages. Areas for the cell (A-O) in the left column (Scale bar,

227 1 or 0.5  $\mu\text{m}$ ) have been shown for further details (1, 2) in the right column (Scale bar,  
228 0.25  $\mu\text{m}$ ). (A-C) the ultrastructures of step 8 round spermatids before manchette  
229 assembly; (D-F) the ultrastructures of step 9-10 spermatids; (G-I) the ultrastructures  
230 of step 10-11 early elongating spermatids spermatids; (J-L) the ultrastructures of step  
231 14-15 late elongating spermatids; (M-O) the ultrastructures of developing axoneme. 1  
232 indicates acrosome, and 2 indicates nuclear membrane in A-C; 1 indicates apical ES,  
233 and 2 indicates microtubule-based manchette in D-L. 1 indicates zoom-in axoneme in  
234 M-O. Nu, nucleus; Ac, acrosome; white arrowheads indicate normal apical ES;  
235 blueberry arrowheads indicate disrupted apical ES; red asterisk indicate vesicle; black  
236 arrowheads indicate normal microtubule-based manchette; red arrowheads indicate  
237 disrupted microtubule-based manchette; yellow arrowheads indicate normal axoneme;  
238 spring green arrowheads indicate autophagosome. **b** Representative confocal  
239 microscope imaging of F-actin (a marker of cytoskeleton) in spermatids by the  
240 immunofluorescent analysis of phalloidin. Areas (A-C) in the upper panels (Scale bar,  
241 10  $\mu\text{m}$ ) have been shown for further details (a-c) in the low panels (Scale bar, 2  $\mu\text{m}$ ).  
242 White arrowheads indicate normal F-actin structure; red arrowheads indicate  
243 disrupted F-actin structure. **c** The percentages of spermatids with abnormal  
244 F-actin-containing cytoskeleton. \* $p < 0.05$ ; \*\* $p < 0.01$ ; \*\*\* $p < 0.001$ ; \*\*\*\* $p < 0.0001$   
245 in **c**.

246

247 F-actin is a marker of cytoskeleton, especially in apical ES and microtubule of the  
248 testis. To further confirm the role of SIRT3 activator Mel in the cytoskeleton, we  
249 scrutinized the distribution of F-actin in spermatids by the immunofluorescent  
250 analysis of phalloidin, which labeled F-actin. Confocal microscopy imaging showed  
251 that the F-actin structure was well oriented in linear arrays parallel to the elongating  
252 spermatid nucleus's long axis in the control group (**Fig. 2b (Aa)**). Similar to the TEM  
253 experiments, Mel rescued the F-actin structure disruption induced by Cd (**Fig. 2b (Bb,**  
254 **Cc)**), and evidently lowered the percentages of spermatid with abnormal  
255 F-actin-containing cytoskeleton (**Fig. 2c**).

256 Taken together, these results manifested that SIRT3 activator Mel regulated  
257 cytoskeleton assembly, including apical ES and microtubule-based manchette in the  
258 elongating spermatid during spermiogenesis. Therefore, SIRT3 might participate in

259 cytoskeleton assembly of elongating spermatids during spermiogenesis, influencing  
260 the sperm motility.

261 **Mel regulates SOD2 deacetylation and PDLIM1 by SIRT3 in Cd-induced**  
262 **testicular cytoskeleton assembly disruption**

263 Above TEM and immunofluorescent analysis displayed that Mel modulated  
264 cytoskeleton assembly, including BTB with basal ES, apical ES and manchette in the  
265 elongating spermatids. To further elucidate the regulatory mechanisms at the  
266 molecular level, we asked how Mel modulated cytoskeleton assembly in testis. The  
267 protein expression of cytoskeleton assembly markers was investigated. Cd  
268 significantly decreased the protein expression of BTB markers—integral membrane  
269 proteins (Occludin, JAM-A, N-cadherin), adaptor protein ( $\beta$ -catenin) and regulatory  
270 proteins (FAK, p-FAK-Tyr407) (**Fig. 3a, 3b**). In addition to  $\beta$ -catenin, the reduction  
271 of other proteins was successfully reversed by Mel. Actually, p-FAK-Tyr407 is a  
272 molecular ‘switch’ in the apical ES–BTB axis to regulate BTB restructuring and  
273 apical ES adhesion. These results corresponded to the changes of TEM in BTB and  
274 apical ES. PDLIM1, NUDC are the identified F-actin networks negative regulator,  
275 whose overexpression results in the disassembly of the F-actin net structure in Sertoli  
276 cells (Liu et al., 2016). Besides, PDLIM1 is critical for ES assembly. Our results  
277 showed that SIRT3 activator Mel reversed the protein expression augment of  
278 PDLIM1 and NUDC induced by Cd in testis (**Fig. 3c, 3d**). Therefore, Mel might  
279 regulate cytoskeleton assembly by PDLIM1.

280 Our previous studies showed that Cd elevated testicular ROS level and reduced  
281 SOD activity in testis (Chen et al., 2018a) and serum (Wang et al., 2020). SIRT3 is  
282 the most robust mitochondrial deacetylase, and SOD2 (also named MnSOD) is just  
283 the identified downstream of SIRT3 in the liver (Tao et al., 2010). To investigate the  
284 correlation of SIRT3 and SOD2 in testis, we examined the interaction of SIRT3 and  
285 SOD2 by co-immunoprecipitation (co-IP). The results indicated that Cd decreased the  
286 protein expression of SIRT3 and disturbed the interaction of SIRT3 and SOD2;  
287 whereas, SIRT3 activator Mel could effectively increase the protein expression of  
288 SIRT3 and the affinity of SIRT3 and SOD2 (**Fig. 3e**). Notably, Cd or Mel had no  
289 significant effect on the protein expression of SOD2 (**Fig. 3e**). Then, what is the direct



290 mechanism of the interaction between SIRT3 and SOD2? Whether does SIRT3 exert  
291 its role as deacetylase?

292 To test the hypothesis, SOD2 acetylation levels were determined by the anti-SOD2  
293 antibody with anti-SOD2<sup>K68Ac</sup> antibody. Significantly, Cd elevated the acetylation of  
294 SOD2; Mel reduced the acetylation of SOD2 compared with the Cd-treated group  
295 (Fig. 3f, 3g), suggesting that SIRT3 regulated SOD2 deacetylation by directly  
296 interacting with SOD2 to mediate oxidative stress in testis.

297 These data indicated that Mel regulated SOD2 deacetylation and PDLIM1 by  
298 SIRT3 in Cd-induced testicular cytoskeleton assembly disruption.

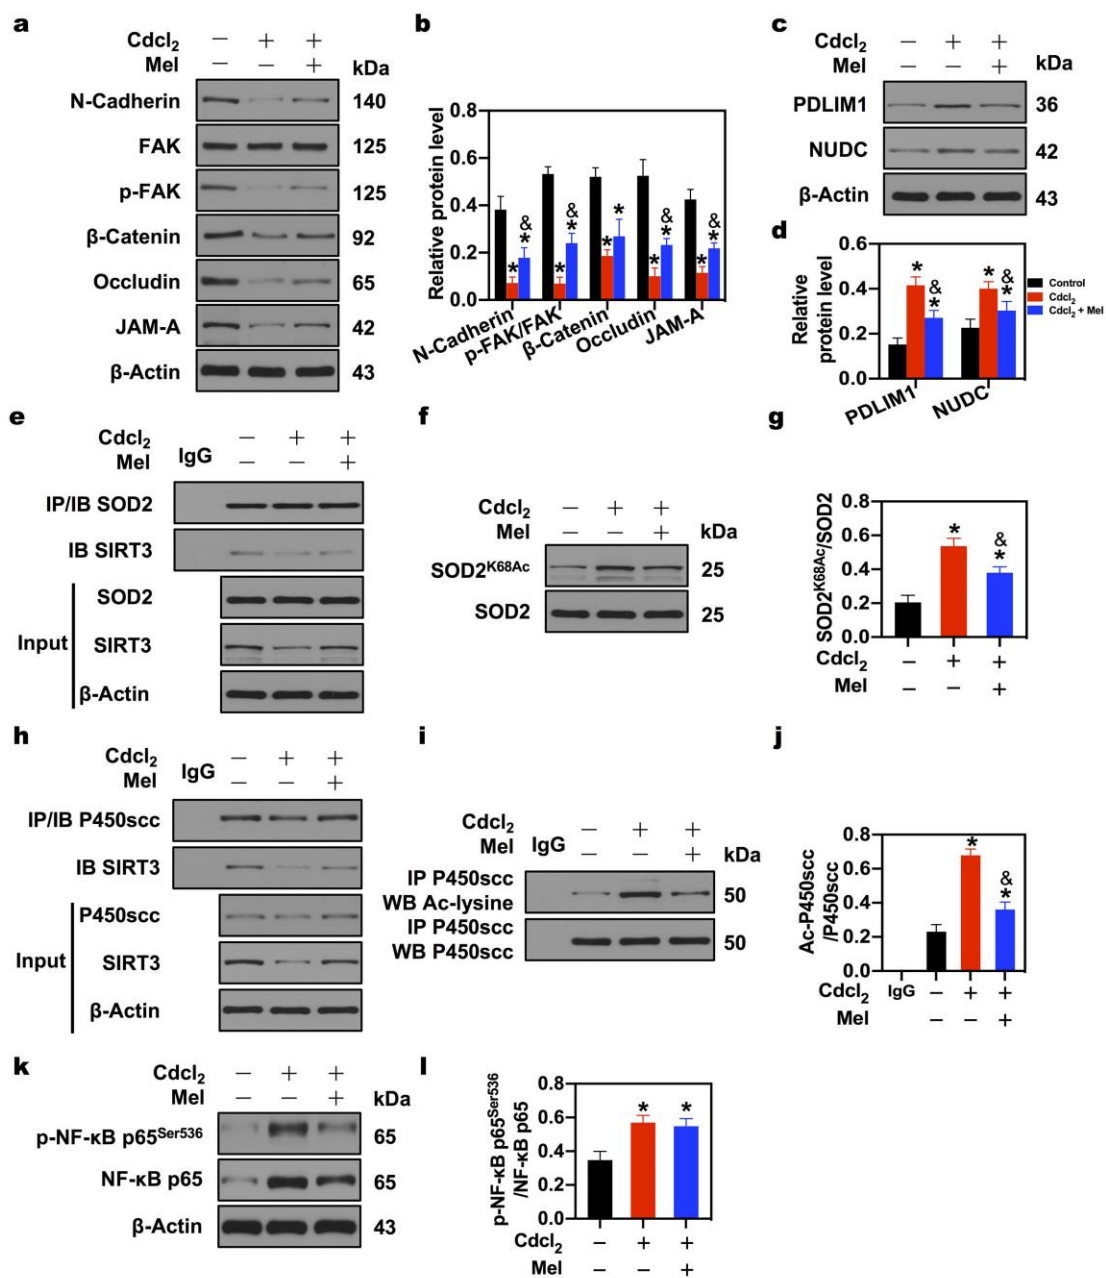

299



300 **Fig. 3 Mel regulates SOD2/P450scc deacetylation by SIRT3, and PDLIM1,**  
301 **NF- $\kappa$ B p65<sup>Ser536</sup> phosphorylation and P450scc deacetylation by SIRT3 in**  
302 **Cd-induced testicular injury. a-b** A representative immunoblot and quantification  
303 analysis of BTB markers N-Cadherin,  $\beta$ -Catenin, Occludin, JAM-A and apical ES–  
304 BTB axis switch FAK, p-FAK-Tyr407 in testis. **c-d** A representative immunoblot and  
305 quantification analysis of cytoskeleton negative regulators PDLIM1, NUDC in testis.  
306 **e** Co-immunoprecipitation (Co-IP) of SOD2 and SIRT3 in testis. **f-g** A representative  
307 immunoblot and quantification analysis of SOD2 acetylation level. **h** Co-IP  
308 of P450scc and SIRT3 in testis. **i-j** IP of P450scc and Ac-lysine, and quantification  
309 analysis of P450scc acetylation level in testis. **k-l** A representative immunoblot and  
310 quantification analysis of NF- $\kappa$ B p65<sup>Ser536</sup> phosphorylation. \* $p < 0.05$  compared with  
311 the control. & $p < 0.05$  compared with the Cd-treated group.

312

313 **Mel regulates P450scc deacetylation by SIRT3 and NF- $\kappa$ B p65<sup>Ser536</sup>**  
314 **phosphorylation in Cd-induced testicular cholesterol metabolism disruption**

315 In cholesterol metabolism, cholesterol is delivered into the mitochondria through  
316 StAR (gene name Star), and converted to pregnenolone by the catalysis of P450scc  
317 (Hsu et al., 2006), which has been considered the rate-limiting step of testosterone  
318 biosynthesis. Although Cd increased the expression of Star and cholesterol level, the  
319 testosterone level is decreased (**Fig. 1**). A study proposed that the deacetylation of  
320 P450scc was associated with SIRT3 and SIRT5 in resveratrol-mediated cortisol  
321 biosynthesis (Li et al., 2012). Thus, we speculated whether Mel operated P450scc  
322 deacetylation via SIRT3 in this process. Co-IP was performed to verify the interaction  
323 of SIRT3 and P450scc. Cd decreased the protein expression of SIRT3 and disturbed  
324 the interaction of SIRT3 and P450scc; whereas, Mel effectively increased the protein  
325 expression of SIRT3 and the affinity of SIRT3 and P450scc (**Fig. 3h**). Whether Cd or  
326 Mel had no significant effect on the protein expression of P450scc (**Fig. 3h**).  
327 Synchronously, P450scc acetylation levels were determined by immunoprecipitation  
328 with an anti-P450scc antibody, followed by immunoblot analysis of acetylated-lysine.  
329 Cd elevated the acetylation of P450scc; Mel reduced the acetylation of P450scc  
330 compared with the Cd-treated group (**Fig. 3i, 3j**), suggesting that SIRT3 regulated

331 P450scc deacetylation by directly interacting with P450scc to mediate cholesterol  
332 metabolism in testis.

333 Then, how does Mel exert its role on SIRT3 in testis? Given that Mel could  
334 remarkably alleviate inflammasome-induced pyroptosis by blocking NF- $\kappa$ B p65  
335 signal in mice adipose tissue (Liu et al., 2017b), and the inhibition of NF- $\kappa$ B p65  
336 regulated testosterone production by Nur77 and SF-1 (Hong et al., 2004), thus the  
337 activity of NF- $\kappa$ B p65 was observed. We noticed that Cd indeed stimulated NF- $\kappa$ B  
338 p65<sup>Ser536</sup> phosphorylation, and Mel mitigated the phosphorylation of NF- $\kappa$ B p65<sup>Ser536</sup>.  
339 Meanwhile, Mel reversed Cd-induced protein expression changes of NF- $\kappa$ B p65 and  
340 p-NF- $\kappa$ B p65<sup>Ser536</sup> respectively. Nonetheless, the ratio of p-NF- $\kappa$ B p65<sup>Ser536</sup>/NF- $\kappa$ B  
341 p65 did not exhibit a significant difference between the Cd-treated group and Cd with  
342 Mel group (**Fig. 3k, 3l**). Above results evidenced that Mel regulates P450scc  
343 deacetylation by SIRT3 and NF- $\kappa$ B p65 in Cd-induced testicular cholesterol  
344 metabolism disruption.

345

346 **Mel-mediated cholesterol metabolism protection is dependent on Sirt3, which is**  
347 **the upstream regulator of P450scc deacetylation, but not of NF- $\kappa$ B p65<sup>Ser536</sup>**  
348 **phosphorylation in TM3 mouse Leydig cells**

349 To further validate the role of SIRT3 in cholesterol metabolism in Leydig cells, we  
350 generated Sirt3 overexpression and knockdown models in TM3 mouse Leydig cells  
351 (TM3 cells). The efficiencies of Sirt3 overexpression and knockdown were examined  
352 (**supplementary Fig. 1c**).

353 Initially, we got the half-maximal inhibitory concentration (IC<sub>50</sub>) of Cd for TM3  
354 cells—8.725  $\mu$ g/ml by the concentration gradient method (Wang et al., 2020), which  
355 was exploited in subsequent experiments. Cell Counting Kit-8 (CCK-8) assay  
356 indicated that Mel significantly rescued cell viability reduction induced by Cd (**Fig.**  
357 **4a<sub>1</sub>**—the first panel in Fig. 4a), implying that Mel blocked the specific injury process.  
358 To determine whether Mel-mediated protection depends on SIRT3 or not, Sirt3  
359 overexpression adenovirus (Ad-Sirt3) and Sirt3 knockdown adenovirus with shRNA  
360 (Sh-Sirt3) were utilized. Like Mel, the overexpression of Sirt3 rescued cell viability  
361 reduction induced by Cd (**Fig. 4a<sub>2</sub>**), suggesting that Sirt3 participated in the specific  
362 protection process. Interestingly, the knockdown of Sirt3 decreased TM3 cell viability,  
363 but Mel failed to rescue sh-Sirt3-induced cell viability reduction (**Fig. 4a<sub>3</sub>**), revealing

364 that Sirt3 dominated the protection process, and scilicet Mel-mediated cell viability  
365 protection was dependent on Sirt3 in TM3 cells.

366 Flow cytometry analysis confirmed the results of the CCK-8 assay. Cd significantly  
367 decreased the percentage of viable cells and increased the percentage of necrotic,  
368 early and late apoptotic cells; remarkably, Mel reversed Cd-triggered TM3 cell  
369 apoptosis (**Supplementary Fig. 2a; Fig. 4b<sub>1</sub>**). Moreover, the overexpression of Sirt3  
370 rescued apoptosis induced by Cd, but Mel did not rescue sh-Sirt3-induced apoptosis  
371 in TM3 cells (**Supplementary Fig. 2b, 2c; Fig. 4b<sub>2,3</sub>**), demonstrating that  
372 Mel-mediated cell apoptosis protection was dependent on Sirt3 in TM3 cells.

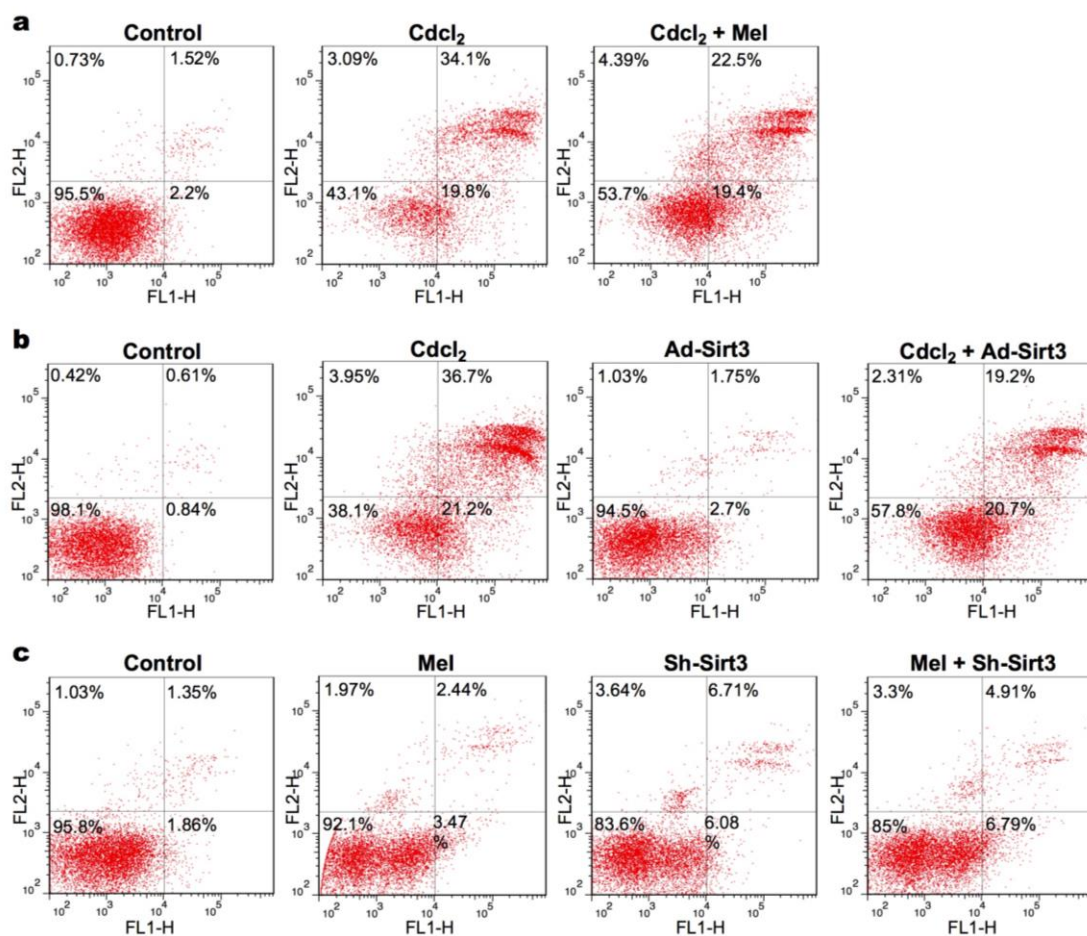

373

374 **Supplementary Fig. 2 Mel-mediated cell apoptosis protection is dependent on**  
375 **Sirt3 in TM3 cells.** Representative flow cytometry analysis: **a** Mel reverses  
376 Cd-triggered TM3 cell apoptosis. **b** The overexpression of Sirt3 rescues apoptosis  
377 induced by Cd in TM3 cells. **c** Mel fails to rescue sh-Sirt3-induced apoptosis in TM3  
378 cells.

379

380 Subsequently, the level of testosterone, total cholesterol (TC), and free cholesterol  
381 (FC) in TM3 cells were scrutinized. Consistent with in vivo results, Cd decreased  
382 testosterone level and increased TC and FC level, which were reversed by Mel (**Fig.**  
383 **4c<sub>1</sub>, 4d<sub>1</sub>, 4e<sub>1</sub>**). Likewise, the overexpression of Sirt3 defended testosterone, TC, and  
384 FC disruption induced by Cd in TM3 cells (**Fig. 4c<sub>2</sub>, 4d<sub>2</sub>, 4e<sub>2</sub>**). The knockdown of  
385 Sirt3 led to analogous testosterone, TC, and FC disruption as Cd, which did not be  
386 salvaged by Mel (**Fig. 4c<sub>3</sub>, 4d<sub>3</sub>, 4e<sub>3</sub>**), indicating that Mel-mediated testosterone and  
387 cholesterol protection was dependent on Sirt3 in TM3 cells.

388 Testosterone synthesis is derived from the cholesterol mechanism. To further  
389 clarify, in Leydig cell, the specific effect of SIRT3 on regulating testosterone and  
390 cholesterol, we detected cholesterol metabolism markers, including Hmgcr and  
391 Hmgcs1 (cholesterol biosynthesis markers), Abca1 (cholesterol efflux marker), Star  
392 (mitochondrial cholesterol transporter), Scap/Srebf2 (cholesterol metabolism  
393 regulators), Hsd17b3 (testosterone biosynthesis marker). Both Hmgcr and Hmgcs1  
394 were not disturbed by Cd, Mel, Ad-Sirt3 and sh-Sirt3, suggesting that Sirt3 did not  
395 correlate with cholesterol biosynthesis (**Fig. 4f**). Cd significantly diminished the  
396 expression of Abca1 and elevated the expression of Star, implying that Cd enhanced  
397 cholesterol influx; Cd reduced the expression of Scap, Srebf2 and Hsd17b3, implying  
398 that Cd impaired the regulation of cholesterol metabolism; however, Mel rescued  
399 cholesterol metabolism disruption by reversing the expression of Abca1, Star, Scap,  
400 Srebf2 and Hsd17b3 (**Fig. 4f<sub>1</sub>**). In parallel, the overexpression of Sirt3 protected from  
401 cholesterol metabolism disruption induced by Cd in TM3 cells (**Fig. 4f<sub>2</sub>**). Instead, the  
402 knockdown of Sirt3 induced cholesterol metabolism disruption similar to Cd, which  
403 did not be rescued by Mel (**Fig. 4f<sub>3</sub>**), indicating that Mel-mediated cholesterol  
404 metabolism was dependent on Sirt3 in TM3 cells.

405 In vivo study, we found Mel might regulate NF- $\kappa$ B p65<sup>ser536</sup> phosphorylation to  
406 mediate SIRT3 with P450scc deacetylation in Cd-induced testicular cholesterol  
407 metabolism disruption. Herein, NF- $\kappa$ B p65<sup>ser536</sup> phosphorylation and P450scc  
408 deacetylation were investigated in TM3 mouse Leydig cells. As expected, Cd  
409 significantly stimulated NF- $\kappa$ B p65<sup>Ser536</sup> phosphorylation, which was weakened by  
410 Mel in TM3 cells (**Fig. 4g<sub>1</sub>, 4j<sub>1</sub>**). Nonetheless, the overexpression of Sirt3 showed no  
411 difference in NF- $\kappa$ B p65<sup>Ser536</sup> phosphorylation compared with the control group and  
412 failed to reverse Cd-stimulated NF- $\kappa$ B p65<sup>Ser536</sup> phosphorylation (**Fig. 4g<sub>2</sub>, 4j<sub>2</sub>**).



413 Despite that Mel indeed inhibited NF- $\kappa$ B p65<sup>Ser536</sup> phosphorylation, the knockdown of  
 414 Sirt3 didn't influence NF- $\kappa$ B p65<sup>Ser536</sup> phosphorylation (**Fig. 4g<sub>3</sub>, 4j<sub>3</sub>**). Results  
 415 suggested that, in TM3 cells, Mel regulated NF- $\kappa$ B p65<sup>Ser536</sup> phosphorylation, which  
 416 was not dominated by Sirt3.

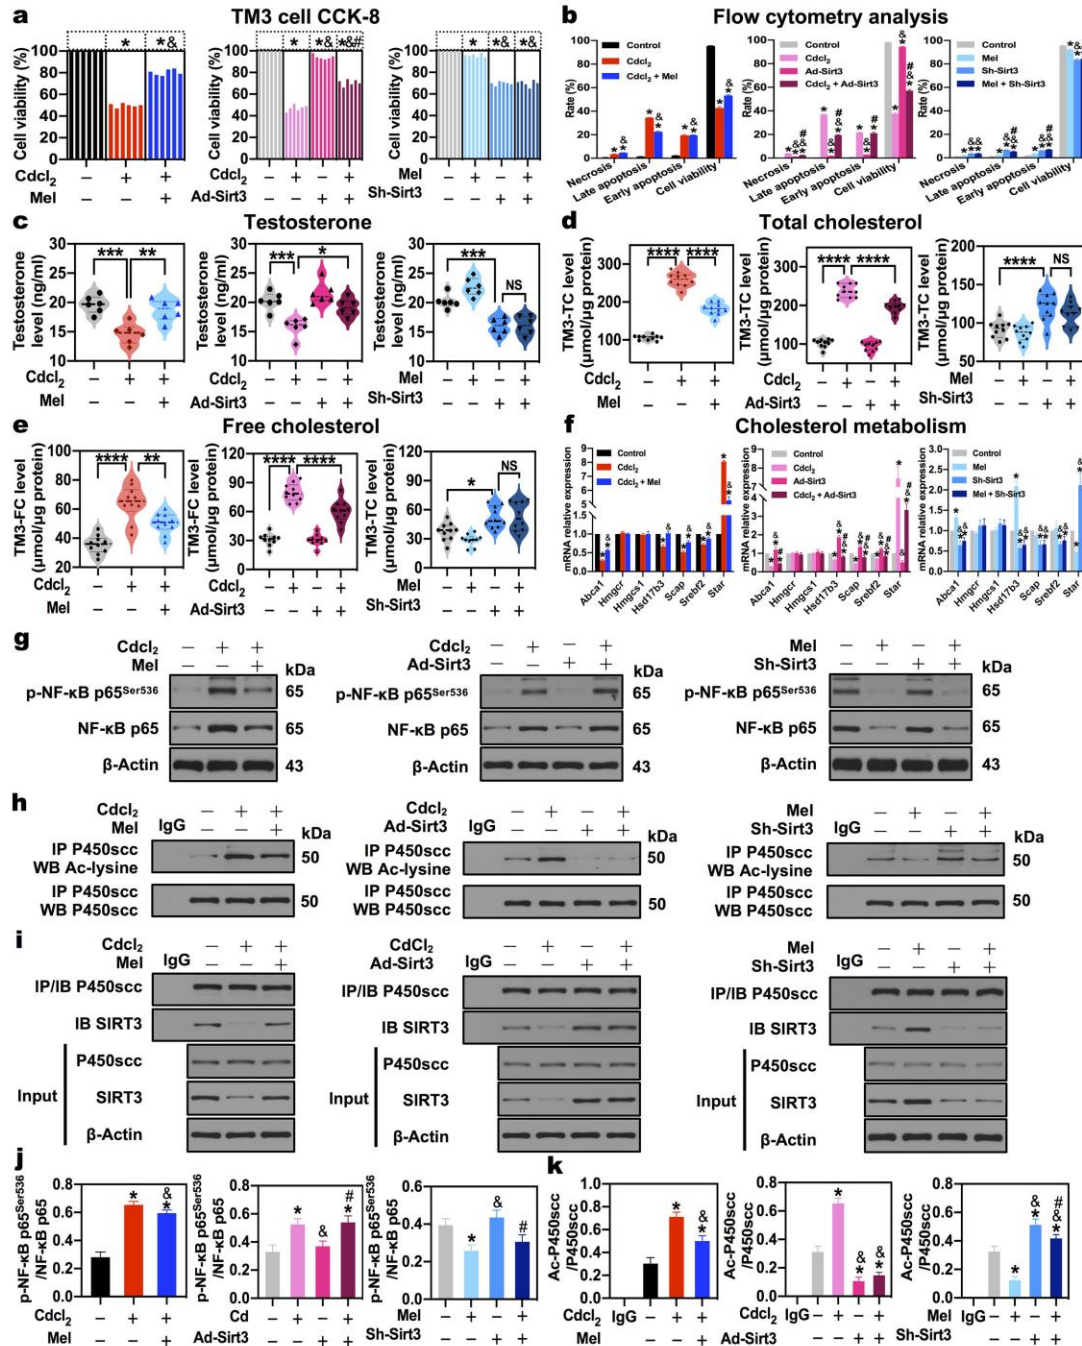

417

418 **Fig. 4 Mel-mediated cholesterol metabolism protection is dependent on Sirt3,**  
 419 **which is the upstream regulator of P450scc deacetylation, but not of NF- $\kappa$ B**  
 420 **p65<sup>Ser536</sup> phosphorylation in TM3 mouse Leydig cells. a** Cell viability analysis by  
 421 **CCK-8 assay. b** Necrosis, late apoptosis, early apoptosis, cell viability analysis by



422 flow cytometry. **c** Testosterone level in TM3 cells supernatants. **d** Total cholesterol  
423 level in TM3 cells. **e** Free cholesterol level in TM3 cells. **f** mRNA expression levels  
424 of cholesterol metabolism markers of *Abca1*, *Hmgcr*, *Hmgcs1*, *Hsd17b1*, *Scap*,  
425 *Srebf2*, *Star* in TM3 cells. **g, j** A representative immunoblot and quantification  
426 analysis of NF- $\kappa$ B p65<sup>Ser536</sup> phosphorylation in TM3 cells. **h, k** IP of P450scc and  
427 Ac-lysine, and quantification analysis of P450scc acetylation level in TM3 cells. **i**  
428 Co-IP of P450scc and SIRT3 in TM3 cells. NS,  $p > 0.05$ ; \* $p < 0.05$ ; \*\* $p < 0.01$ ;  
429 \*\*\* $p < 0.001$ ; \*\*\*\* $p < 0.0001$  in **a-e**. \* $p < 0.05$  compared with the first group  
430 (control). & $p < 0.05$  compared with the second group, # $p < 0.05$  compared with the  
431 third group in each panel of **f, j, k**.

432

433 Subsequently, we found that Cd promoted P450scc acetylation, which was rescued  
434 by Mel in TM3 cells (**Fig. 4h<sub>1</sub>, 4k<sub>1</sub>**). Noticeably, the overexpression of Sirt3 lessened  
435 P450scc acetylation and reversed Cd-induced P450scc acetylation (**Fig. 4h<sub>2</sub>, 4k<sub>2</sub>**); the  
436 knockdown of Sirt3 dramatically boosted P450scc acetylation and reversed  
437 Mel-induced P450scc deacetylation (**Fig. 4h<sub>3</sub>, 4k<sub>3</sub>**), indicating that Mel regulated  
438 P450scc deacetylation, which was dominated by Sirt3.

439 To further confirm the interaction between SIRT3 and P450scc, co-IP experiment  
440 was performed in TM3 cells. Consequently, Cd, Mel, Ad-Sirt3 or sh-Sirt3 had no  
441 significant effect on the protein expression of P450scc; strikingly, Cd reduced the  
442 interaction of SIRT3 and P450scc, which was reversed by Mel (**Fig. 4i<sub>1</sub>**). The  
443 overexpression of Sirt3 contributed to the interaction of SIRT3 and P450scc and  
444 rescued Cd-induced disruption (**Fig. 4i<sub>2</sub>**); the knockdown of Sirt3 impaired the  
445 interaction of SIRT3 and P450scc, which failed to be reversed by Mel (**Fig. 4i<sub>3</sub>**),  
446 displaying that SIRT3 directly interacted with P450scc to mediate P450scc  
447 deacetylation.

448 Above results demonstrated that Mel-mediated cholesterol metabolism protection  
449 was dependent on Sirt3, which was the upstream regulator of P450scc deacetylation,  
450 but not of NF- $\kappa$ B p65<sup>Ser536</sup> phosphorylation in TM3 mouse Leydig cells.

451

452 **NF- $\kappa$ B, as the upstream transcription factor, represses Sirt3 transcription by**  
453 **binding to TFBS1 and TFBS2 of Sirt3 promoter in TM3 mouse Leydig cells**

454 Due to three facts as follows: (1) Mel-mediated cholesterol metabolism was  
455 dependent on Sirt3 in TM3 cells; (2) Mel regulated NF- $\kappa$ B p65<sup>Ser536</sup> phosphorylation  
456 in TM3 cells; (3) Sirt3 was not the upstream regulator of NF- $\kappa$ B p65<sup>Ser536</sup>  
457 phosphorylation in TM3 cells, we speculated that Sirt3 was the downstream of NF- $\kappa$ B  
458 p65 in Mel-mediated cholesterol metabolism. Phosphorylation of p65 at Ser536 led to  
459 nuclear localization of the transcriptionally active complex, and NF- $\kappa$ B mediated  
460 transactivation of several downstream genes (Mai et al., 2020). To test the conjecture,  
461 we examined the cytoplasmic and nuclear localization of NF- $\kappa$ B molecules in Cd  
462 with or without Mel-treated TM3 cells. As shown in **Fig. 5a**, Cd resulted in slightly  
463 increased nuclear translocation of c-Rel and robust nuclear translocation of p50, p65  
464 and RelB, which could be ameliorated by Mel, suggesting that phosphorylation  
465 of p65 at Ser536 indeed stimulated nuclear translocation of NF- $\kappa$ B molecules in TM3  
466 cells.

467 Querying UCSC Genome browser (<https://genome.ucsc.edu>) with expanded  
468 JASPAR database, NF- $\kappa$ B subunits, including RELA (also named p65), RELB and  
469 REL, were predicted as putative upstream transcription factors for mouse Sirt3 gene  
470 (**Supplementary Fig. 3**). To confirm the interaction of NF- $\kappa$ B and Sirt3 promoter  
471 region in TM3 mouse Leydig cells, chromatin immunoprecipitation (ChIP) assay was  
472 performed as described in **Fig. 5b**. Protein-DNA complexes were extracted from TM3  
473 cells and immunoprecipitated using anti-NF- $\kappa$ B (p50, p65, RelB respectively) with  
474 precipitation of normal IgG as the negative control. DNA fragments were amplified  
475 with primers specific for the Sirt3 promoter sequence. ChIP-qPCR assay manifested a  
476 physiological binding of p65, RelB and especially p50 to the Sirt3 promoter in TM3  
477 cells (**Fig. 5c**).

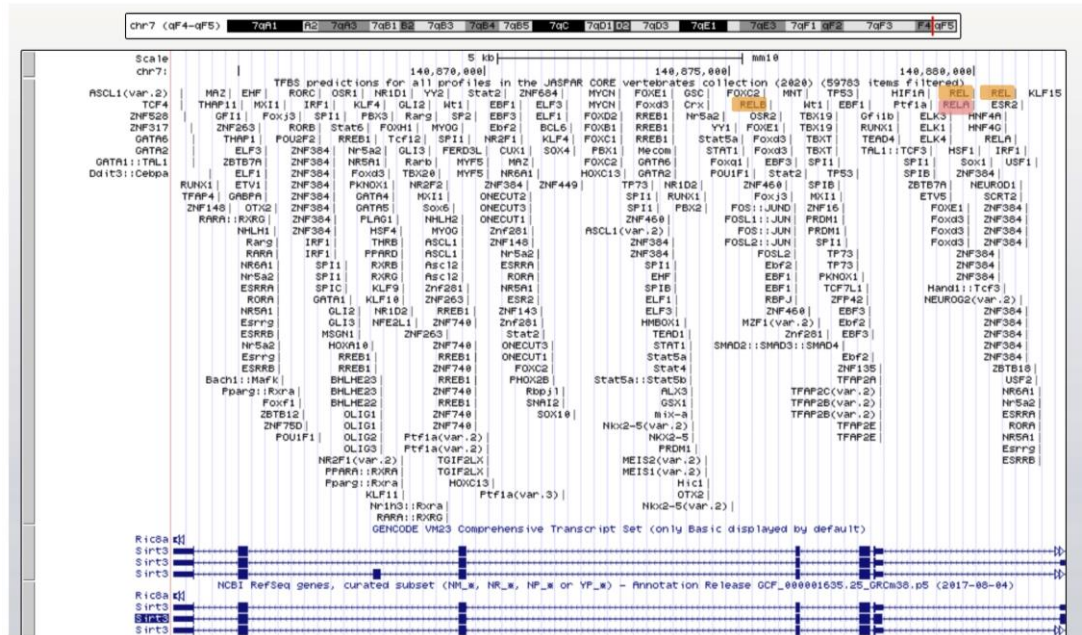

478

479 **Supplementary Fig. 3 Prediction of upstream transcription factors for mouse**  
 480 **Sirt3 gene.** By Querying UCSC Genome browser (<https://genome.ucsc.edu>) with  
 481 expanded JASPAR database, NF- $\kappa$ B subunits, including RELA (also named p55),  
 482 RELB and REL, were predicted as putative upstream transcription factors for mouse  
 483 Sirt3 gene.

484

485 To further substantiate the transcriptional regulation of Sirt3 by NF- $\kappa$ B and  
 486 recognize the specific transcription factor (TF)-DNA binding sequences, we identified  
 487 the consensus sequence of mouse NF- $\kappa$ B p50 by analyzing structural profiles of  
 488 transcription factor binding sites (TFBSs) from JASPAR and UniPROBE databases.  
 489 In fact, the consensus sequence reflected p50 TF-DNA binding preferences, which  
 490 were represented by a position weight matrix (PWM) and visualized as motif logo  
 491 (Fig. 5d). Based on the selected matrix models, three fragments in full-length mouse  
 492 Sirt3 promoter (2kb) were predicted as TFBSs with a relative profile score of greater  
 493 than 0.8 by the JASPAR database (Fig. 5e). Given that gggacgctcc on reverse (minus)  
 494 DNA strand (1948-1957) overlapped with ggagcgtccc on forward (plus) DNA strand  
 495 (1948-1957), there were actually two fragments as putative TFBS1 and TFBS2. In the  
 496 full-length (FL) Sirt3 promoter from -2000 bp to 0 transcription start site (TSS),  
 497 TFBS1 (AGTATTTCCC) locates in -1108 to -1099, and TFBS2 (GGAGCGTCCC)  
 498 locates in -53 to -44 (Fig. 5f(I)). Wild-type (WT) or TFBS1/TFBS2 mutant Sirt3  
 499 promoter (MUT1/MUT2/MUT3) luciferase reporter vector was transiently

500 co-transfected with NF- $\kappa$ B p50 overexpression plasmid (pcDNA3.1-NF-  $\kappa$ B)  
501 into HEK 293T cells (**Fig. 5f**), and relative luciferase activity was measured as a  
502 function of NF- $\kappa$ B p50-dependent Sirt3 transcription. Conspicuously, NF- $\kappa$ B p50  
503 with WT-Sirt3 promoter inhibited the transcription, while NF- $\kappa$ B p50 with  
504 TFBS1/TFBS2 mutant Sirt3 promoter (MUT1/MUT2/MUT3) attenuated the  
505 transcriptional suppression; especially, MUT3 (simultaneous deletion of TFBS1 and  
506 TFBS2) had no difference in transcription compared with empty pGL3-promoter  
507 vector (**Fig. 5g**). Results demonstrated that NF- $\kappa$ B p50 could suppress Sirt3  
508 transcription by binding to TFBS1 and TFBS2 in Sirt3 promoter (**Fig. 5h**), which  
509 responded to the decreased protein expression of SIRT3 in Cd-treated testis and TM3  
510 cells.

511 Above stringing shreds of evidence supported the inference that, **in Leydig cells,**  
512 **phosphorylation of NF- $\kappa$ B p65<sup>Ser536</sup> stimulated the nuclear translocation of**  
513 **NF- $\kappa$ B molecules (subunits p50, p65, RelB), which bound to the promoter of**  
514 **Sirt3; NF- $\kappa$ B (particularly p50) repressed Sirt3 transcription by binding to**  
515 **TFBS1 and TFBS2 in Sirt3 promoter; then, the deficiency of SIRT3 disturbed**  
516 **cholesterol metabolism and testosterone synthesis by impairing P450<sub>scc</sub>**  
517 **deacetylation in male subfertility model induced by Cd.**

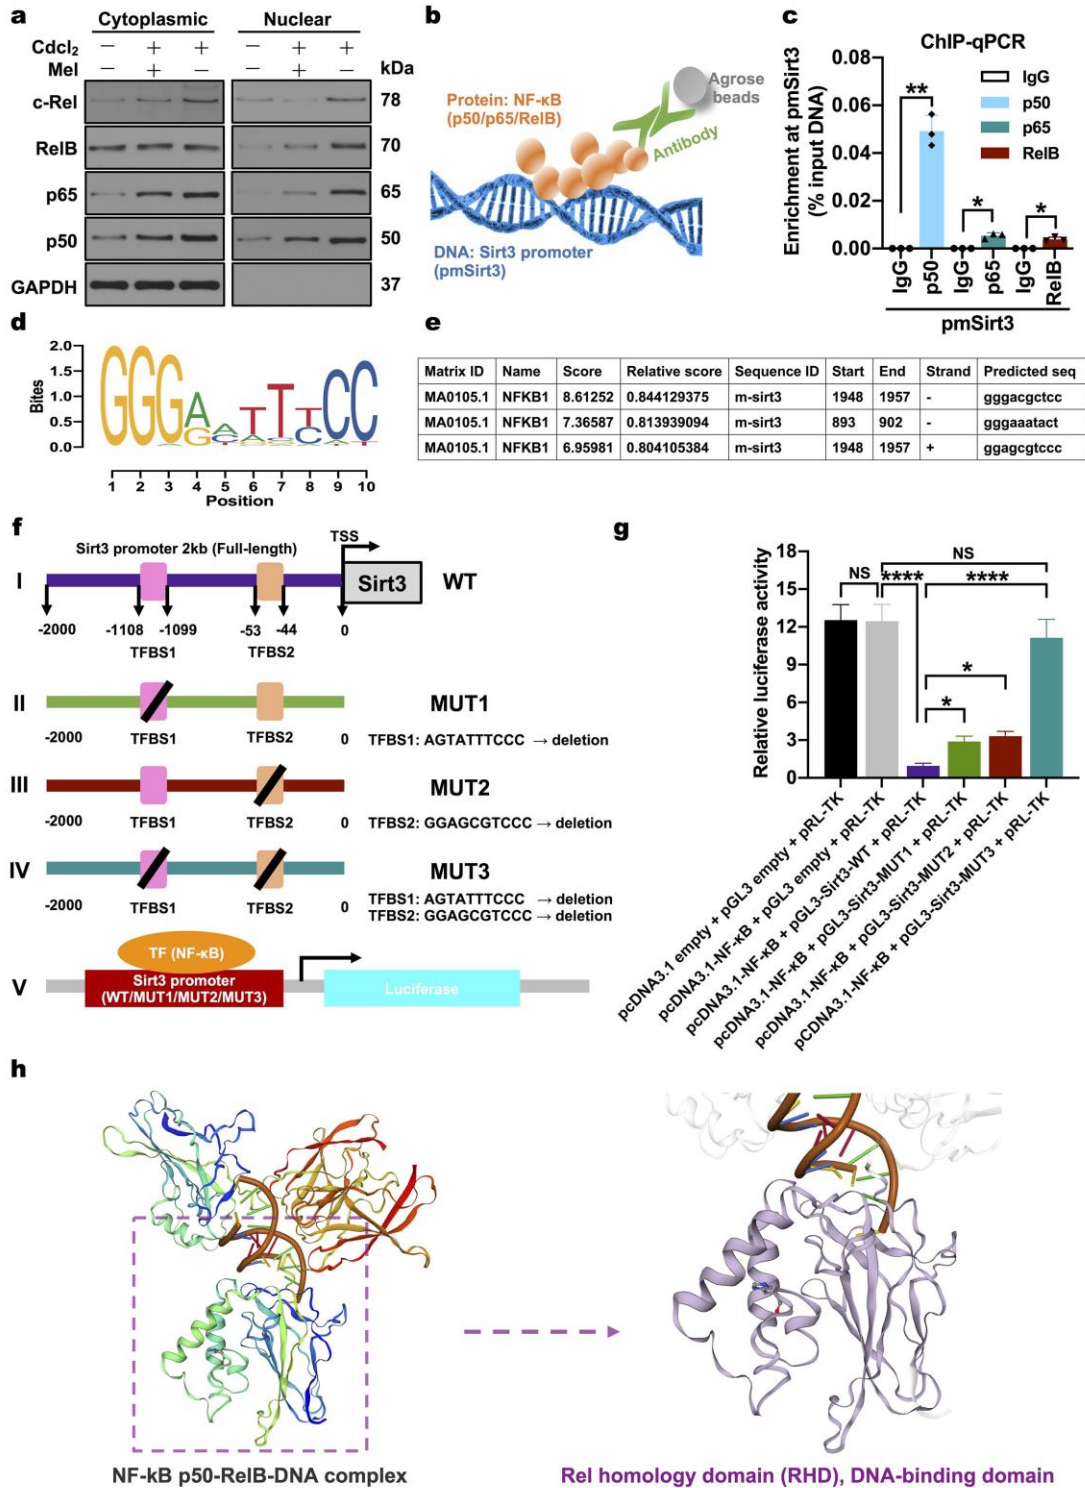

518

519 **Fig. 5 NF- $\kappa$ B, as upstream transcription factor, represses Sirt3 transcription by**  
 520 **binding to TFBS1 and TFBS2 of Sirt3 promoter in TM3 mouse Leydig cells. a**  
 521 **Western blot analysis of the cytoplasmic and nuclear localization of NF- $\kappa$ B molecules**  
 522 **p50, p65, RelB, c-Rel. b ChIP assay model for NF- $\kappa$ B molecules p50, p65, RelB and**  
 523 **Sirt3 promoter. c ChIP assay of p50, p65 and RelB, especially p50, binding to Sirt3**  
 524 **promoter in TM3 cells. d Position weight matrix (PWM) and motif logo of NF- $\kappa$ B1**



525 p50 TF–DNA binding preferences. **e** Predicted transcription factor binding sites  
526 (TFBSs) with a relative profile score of greater than 0.8 by JASPAR database. **f** A  
527 diagram showing the relative positions of full-length (FL) and predicted TFBSs  
528 of Sirt3 promoter reporters and wild-type (WT) and mutant promoter constructions  
529 followed by dual-luciferase reporter assay. **I** the relative positions of FL and predicted  
530 TFBSs of Sirt3 promoter (WT); **II** deletion of TFBS1 (-1108 to -1099,  
531 AGTATTTCCC) for constructing mutant Sirt3 promoter 1 (MUT1); **III** deletion of  
532 TFBS2 (-53 to -44, GGAGCGTCCC) for constructing mutant Sirt3 promoter 2  
533 (MUT2); **IV** simultaneous deletion of TFBS1 and TFBS2 for constructing mutant  
534 Sirt3 promoter 3 (MUT3); **V** a schematic of dual-luciferase reporter assay for  
535 detecting the interaction between NF- $\kappa$ B1 p50 and Sirt3 promoter  
536 (WT/MUT1/MUT2/MUT3). **g** Dual-luciferase reporter assay results showing NF- $\kappa$ B1  
537 p50-dependent suppression of Sirt3 transcription by simultaneously binding to TFBS1  
538 and TFBS2 in Sirt3 promoter in HEK293T cells. **h** 3D structure of NF- $\kappa$ B  
539 p50-RelB-DNA complex from Swiss-Model. Left panel, NF- $\kappa$ B p50-RelB-DNA  
540 complex; right panel, Rel homology domain (RHD), DNA-binding domain. NS,  $p >$   
541 0.05; \* $p < 0.05$ ; \*\* $p < 0.01$ ; \*\*\* $p < 0.001$ ; \*\*\*\* $p < 0.0001$ .

542

### 543 **Overexpression and knockdown of SIRT3 blunts and enhances PDLIM1 and** 544 **SOD2 acetylation in Mel-mediated TM4 mouse Sertoli cell protection**

545 Except for the role of Sirt3 in cholesterol metabolism of Leydig cell, our in vivo study  
546 displayed that Mel might regulate SOD2 deacetylation and PDLIM1 by SIRT3 in  
547 Cd-induced the disruption of cytoskeleton assembly, including basal ES  
548 (Sertoli-Sertoli cell interface), apical ES (Sertoli-elongating spermatid interface) and  
549 microtubule-based manchette. Considering that the disturbed cytoskeleton was related  
550 to the Sertoli cell, and PDLIM1 in Sertoli cell could regulate ES (Liu et al., 2016), we  
551 hypothesized that SIRT3 orchestrated cytoskeleton assembly by PDLIM1 and SOD2  
552 deacetylation in Sertoli cell.

553 To verify the hypothesis, Sirt3 overexpression and knockdown models in TM4  
554 mouse Sertoli cells (TM4 cells) were established. The efficiency of Sirt3  
555 overexpression and knockdown were examined (**supplementary Fig. 1d**). IC<sub>50</sub> of Cd  
556 for TM4 cells—12  $\mu$ g/ml by the concentration gradient method (Wang et al., 2020)  
557 was exploited in subsequent experiments. Similar to TM3 cells, CCK-8 assay

558 indicated that both Mel and overexpression of Sirt3 rescued TM4 cell viability  
559 reduction induced by Cd (**Fig. 6a<sub>1,2</sub>**); the knockdown of Sirt3 decreased cell viability,  
560 but Mel failed to rescue sh-Sirt3-induced cell viability reduction (**Fig. 6a<sub>3</sub>**), hinting  
561 that Sirt3 dominated the protection process. Scilicet Mel-mediated cell viability  
562 protection was dependent on Sirt3 in TM4 cells.

563 Flow cytometry analysis detected the cell viability and apoptosis. Cd significantly  
564 decreased the percentage of viable cells and increased the percentage of necrotic,  
565 early and late apoptotic cells; whereas, Mel reversed Cd-triggered TM4 cell apoptosis  
566 (**Supplementary Fig. 4a; Fig. 6b<sub>1</sub>**). The overexpression of Sirt3 rescued necrosis but  
567 not apoptosis in Cd-treated TM4 cells; the knockdown of Sirt3 facilitated apoptosis,  
568 which couldn't be attenuated by Mel in TM4 cells (**Supplementary Fig. 4b, 4c; Fig.**  
569 **6b<sub>2,3</sub>**), proving that Mel-mediated cell apoptosis protection was dependent on Sirt3 in  
570 TM4 cells.

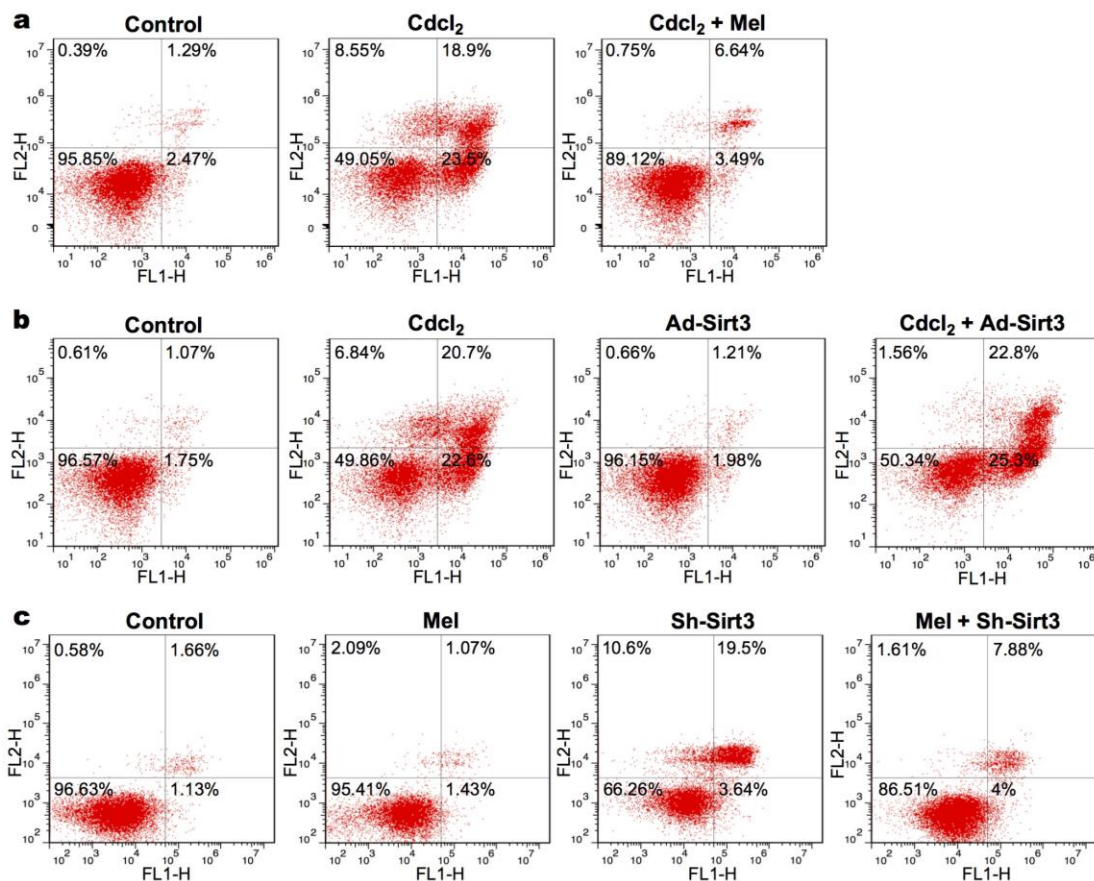

571

572 **Supplementary Fig. 4 Mel-mediated cell apoptosis protection is dependent on**  
573 **Sirt3 in TM4 cells.** Representative flow cytometry analysis: **a** Mel reverses  
574 Cd-triggered TM4 cell apoptosis. **b** The overexpression of Sirt3 rescues necrosis but

575 not apoptosis in Cd-treated TM4 cells. c Mel fails to rescue sh-Sirt3-induced  
576 apoptosis in TM4 cells.

577

578 To address whether SIRT3 regulated SOD2 deacetylation and PDLIM1 in Sertoli  
579 cells, we assessed the PDLIM1 protein levels and SOD2 acetylation when Sirt3 was  
580 overexpressed or restrained. PDLIM1, as negative cytoskeleton regulator, was ignited  
581 in Cd-treated TM4 cells; whereas, Mel extinguished the augment of PDLIM1 protein  
582 level induced by Cd (**Fig. 6c<sub>1</sub>, 6d<sub>1</sub>**). Likewise, the overexpression of Sirt3 reversed the  
583 augment of PDLIM1 protein level induced by Cd (**Fig. 6c<sub>2</sub>, 6d<sub>2</sub>**). Prominently, the  
584 knockdown of Sirt3 provoked the protein expression of PDLIM1, which couldn't be  
585 salvaged by Mel (**Fig. 6c<sub>3</sub>, 6d<sub>3</sub>**), intimating that Sirt3 was indispensable for the  
586 regulation of PDLIM1 in Mel-mediated TM4 cells protection.

587 In terms of SOD2 acetylation, both Mel and the overexpression of Sirt3 parallelly  
588 reversed Cd-induced SOD2 acetylation (**Fig. 6c<sub>1,2</sub>, 6e<sub>1,2</sub>**). Whereas, the knockdown of  
589 Sirt3 impede SOD2 deacetylation and reversed Mel-mediated SOD2 deacetylation  
590 (**Fig. 6c<sub>3</sub>, 6e<sub>3</sub>**), suggesting that Sirt3 was imperative for SOD2 deacetylation in  
591 Mel-mediated TM4 cells protection.

592 To further confirm the interaction between SIRT3 and SOD2, co-IP experiment  
593 was performed in TM4 cells. Consequently, Cd barricaded the interaction of SIRT3  
594 and SOD2, which was reversed by Mel and the overexpression of Sirt3 (**Fig. 6f<sub>1</sub>, 6f<sub>2</sub>**).  
595 The overexpression of Sirt3 significantly facilitated the interaction of SIRT3 and  
596 SOD2 (**Fig. 6f<sub>2</sub>**); whereas, the knockdown of Sirt3 impaired the interaction of SIRT3  
597 and SOD2, which failed to be reversed by Mel (**Fig. 6f<sub>3</sub>**). Taken together, these data  
598 approved that SIRT3 mediated SOD2 deacetylation by directly interacting with SOD2  
599 in TM4 cells.

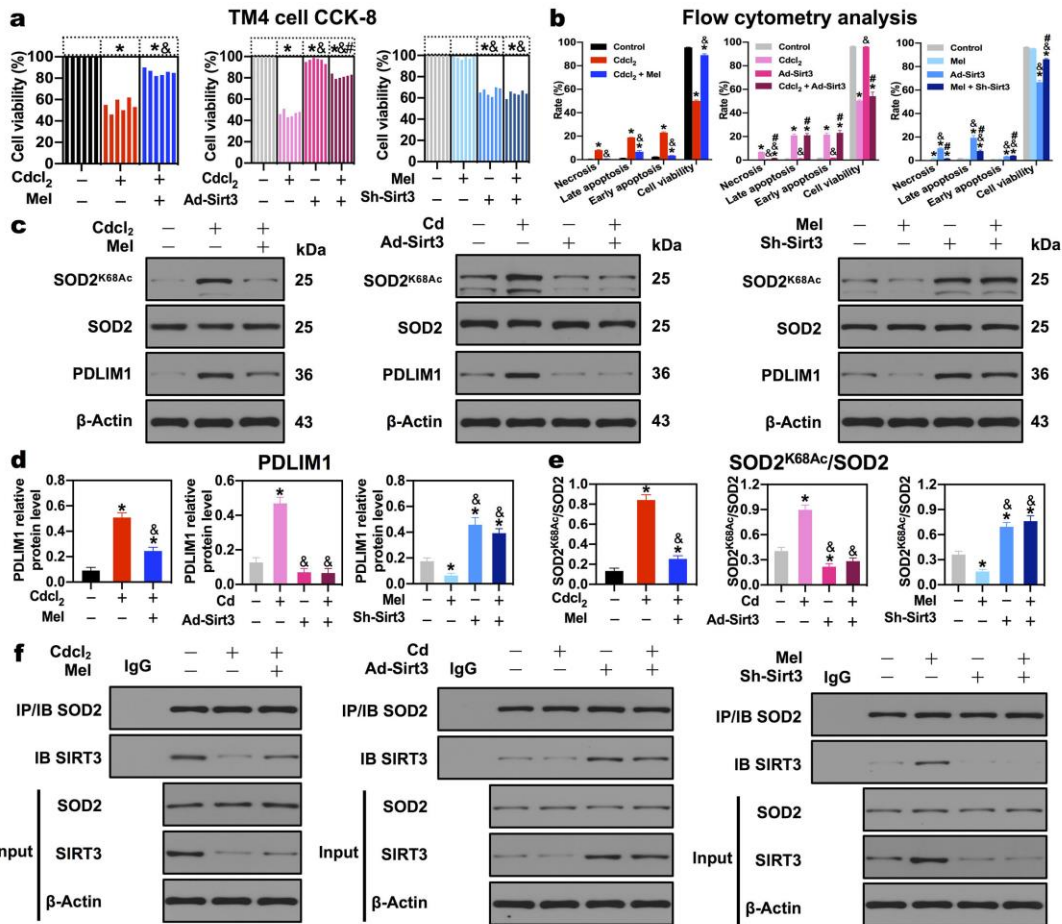

600

601 **Fig. 6 Overexpression and knockdown of SIRT3 blunts and enhances PDLIM1**  
 602 **and SOD2 acetylation in Mel-mediated TM4 mouse Sertoli cell protection.** **a** Cell  
 603 viability analysis by CCK-8 assay. **b** Necrosis, late apoptosis, early apoptosis, cell  
 604 viability analysis by flow cytometry. **c** A representative immunoblot of cytoskeleton  
 605 negative regulator PDLIM1, SOD2 and SOD2<sup>K68Ac</sup> in TM4 cells. **d** Quantification  
 606 analysis of cytoskeleton negative regulator PDLIM1 protein level in TM4 cells. **e**  
 607 Quantification analysis of SOD2 acetylation level in TM4 cells. **f** Co-IP of SOD2 and  
 608 SIRT3 in TM4 cells. \**p* < 0.05 compared with the first group (control). &*p* < 0.05  
 609 compared with the second group, #*p* < 0.05 compared with the third group in each  
 610 panel of **a, b, d, e**.

611

612 **Overexpression and knockdown of Sirt3 protects and impairs the**  
 613 **F-actin-containing cytoskeleton assembly in Mel-mediated TM4 mouse Sertoli**  
 614 **cells protection**

615 F-actin, as a pivotal component of the cytoskeleton, was proposed to be associated  
 616 with PDLIM1 (also named CLP36) twenty years ago (Bauer et al., 2000). A recent



617 study has demonstrated that PDLIM1 competitively binds to ACTN4, which  
618 disaffiliates from F-actin, hampering F-actin organization (Huang et al., 2020).  
619 Critically, PDLIM1 was responsible for ES assembly in Sertoli cell (Liu et al., 2016).  
620 It's rational to deem that SIRT3 regulated PDLIM1 and SOD2 deacetylation to  
621 operate cytoskeleton assembly. To authenticate the role of SIRT3 in cytoskeleton  
622 assembly, we monitored the F-actin distribution by using rhodamine-phalloidin (red)  
623 in Sirt3 overexpression and knockdown models of TM4 mouse Sertoli cells.

624 As depicted in **Fig. 7a**, in normal TM4 cells, a highly ordered F-actin network  
625 wove cytoskeleton to formulate the intact cell; Cd collapsed the F-actin organization,  
626 yet Mel ameliorated the F-actin disruption induced by Cd. The percentages of  
627 abnormal cytoskeletal Sertoli cells per 200 cells were calculated in 6 independent  
628 experiments for each group. Cd increased the rate of abnormal Sertoli cells with  
629 severely F-actin disruption, which was rescued by Mel (**Fig. 7b**), implying that Mel  
630 protected the cytoskeleton assembly in Sertoli cells. The group with Sirt3  
631 overexpression presented a well-organized F-actin structure and salvaged the F-actin  
632 disruption induced by Cd (**Fig. 7c**). Meanwhile, the overexpression of Sirt3 decreased  
633 the rate of abnormal F-actin Sertoli cells compared with Cd (**Fig. 7d**), suggesting that  
634 Sirt3 participated in the Mel-mediated cytoskeleton assembly. Furthermore, the  
635 knockdown of Sirt3 apparently disturbed the F-actin network, which couldn't be  
636 rescued by Mel (**Fig. 7e, 7f**), revealing that Mel-mediated cytoskeleton assembly  
637 protection was dependent on Sirt3 in TM4 cells.

638 Overall, these results indicated that **SIRT3, in Sertoli cells, regulated SOD2**  
639 **deacetylation and negative cytoskeleton protein PDLIM1 to orchestrate**  
640 **F-actin-containing cytoskeleton assembly, which accounted for basal ES (Sertoli**  
641 **cell-Sertoli cell interface) and apical ES (Sertoli cell-spermatid interface), even**  
642 **microtubule-based manchette in elongating spermatids.**

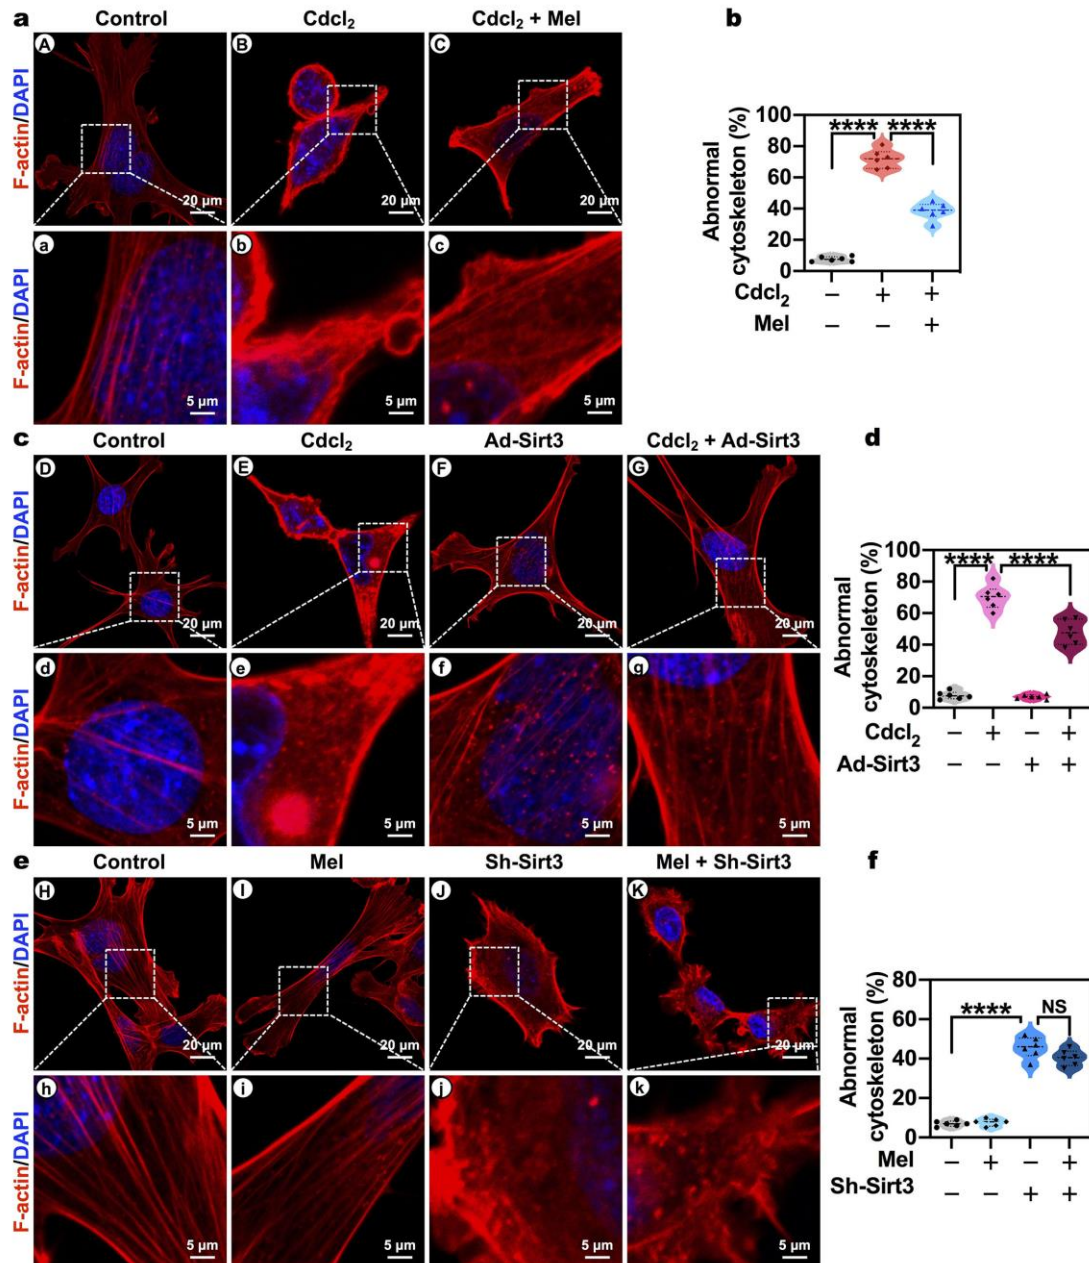

643

644 **Fig. 7 Overexpression and knockdown of Sirt3 protects and impairs the**  
 645 **F-actin-containing cytoskeleton assembly in Mel-mediated TM4 mouse Sertoli**  
 646 **cells protection. a, c, e** Representative confocal microscope imaging of F-actin (a  
 647 marker of cytoskeleton) in TM4 cells by the immunofluorescent analysis of phalloidin.  
 648 Areas (A-K) in the upper panels (Scale bar, 20  $\mu$ m) have been shown for further  
 649 details (a-k) in the low panels (Scale bar, 5  $\mu$ m). (A-C) Mel protects the cytoskeleton  
 650 assembly in TM4 cells; (D-G) Sirt3 overexpression presents well-organized F-actin  
 651 structure, and salvages the F-actin disruption induced by Cd; (H-K) the knockdown of  
 652 Sirt3 apparently disturbs the F-actin network, which fails to be rescued by Mel. **b, d, f**

653 The percentages of TM4 cells with abnormal F-actin-containing cytoskeleton per 200  
654 cells. \* $p < 0.05$ ; \*\* $p < 0.01$ ; \*\*\* $p < 0.001$ ; \*\*\*\* $p < 0.0001$ .

655

## 656 Discussion

657 Mammalian spermatogenesis requires highly-coordinated Sertoli cell and Leydig cell  
658 for germ cell differentiation through mitosis, meiosis, and spermiogenesis (**Fig. 8**). The  
659 absence of this homeostasis impairs sperm count and motility, eliciting male infertility  
660 (Garolla et al., 2013; Wang et al., 2019). Mammalian spermatogenesis requires  
661 highly-coordinated Sertoli cells and Leydig cells for germ cells differentiation  
662 through mitosis, meiosis, and spermiogenesis. Here, we elucidate that SIRT3 exerts a  
663 dual role in testis: regulating cholesterol metabolism and cytoskeleton assembly  
664 during spermatogenesis. Mechanistically, in Leydig cells, phosphorylation of NF- $\kappa$ B  
665 p65<sup>Ser536</sup> stimulates the nuclear translocation of NF- $\kappa$ B molecules (subunits p50, p65,  
666 RelB), which bind to the promoter of Sirt3; particularly, p50 represses Sirt3  
667 transcription by simultaneously binding to TFBS1 and TFBS2 in Sirt3 promoter; then,  
668 inhibited SIRT3 disturbs cholesterol metabolism markers ABCA1, StAR and P450scc  
669 deacetylation (**Fig. 8(II)**). Whereas, in Sertoli cells, SIRT3 regulates SOD2  
670 deacetylation and negative cytoskeleton protein PDLIM1 to orchestrate  
671 F-actin-containing cytoskeleton assembly, including microtubule, basal ES (Sertoli  
672 cell-Sertoli cell interface) in blood-testis barrier (BTB) via JAM-A, Occluding,  
673 N-Cadherin,  $\beta$ -catenin (**Fig. 8(III)**). SIRT3 mediates cytoskeleton assembly of  
674 elongating spermatids, including apical ES (Sertoli cell-spermatid interface), even  
675 microtubule-based manchette during spermiogenesis (**Fig. 8(I)**). To sum up,  
676 NF- $\kappa$ B-repressed SIRT3 acts directly on cholesterol metabolism of Leydig cells and  
677 cytoskeleton assembly of Sertoli cells via P450scc/SOD2 deacetylation to regulate  
678 sperm differentiation, influencing spermatogenesis, even male fertility.



## SIRT3 in testicular cells

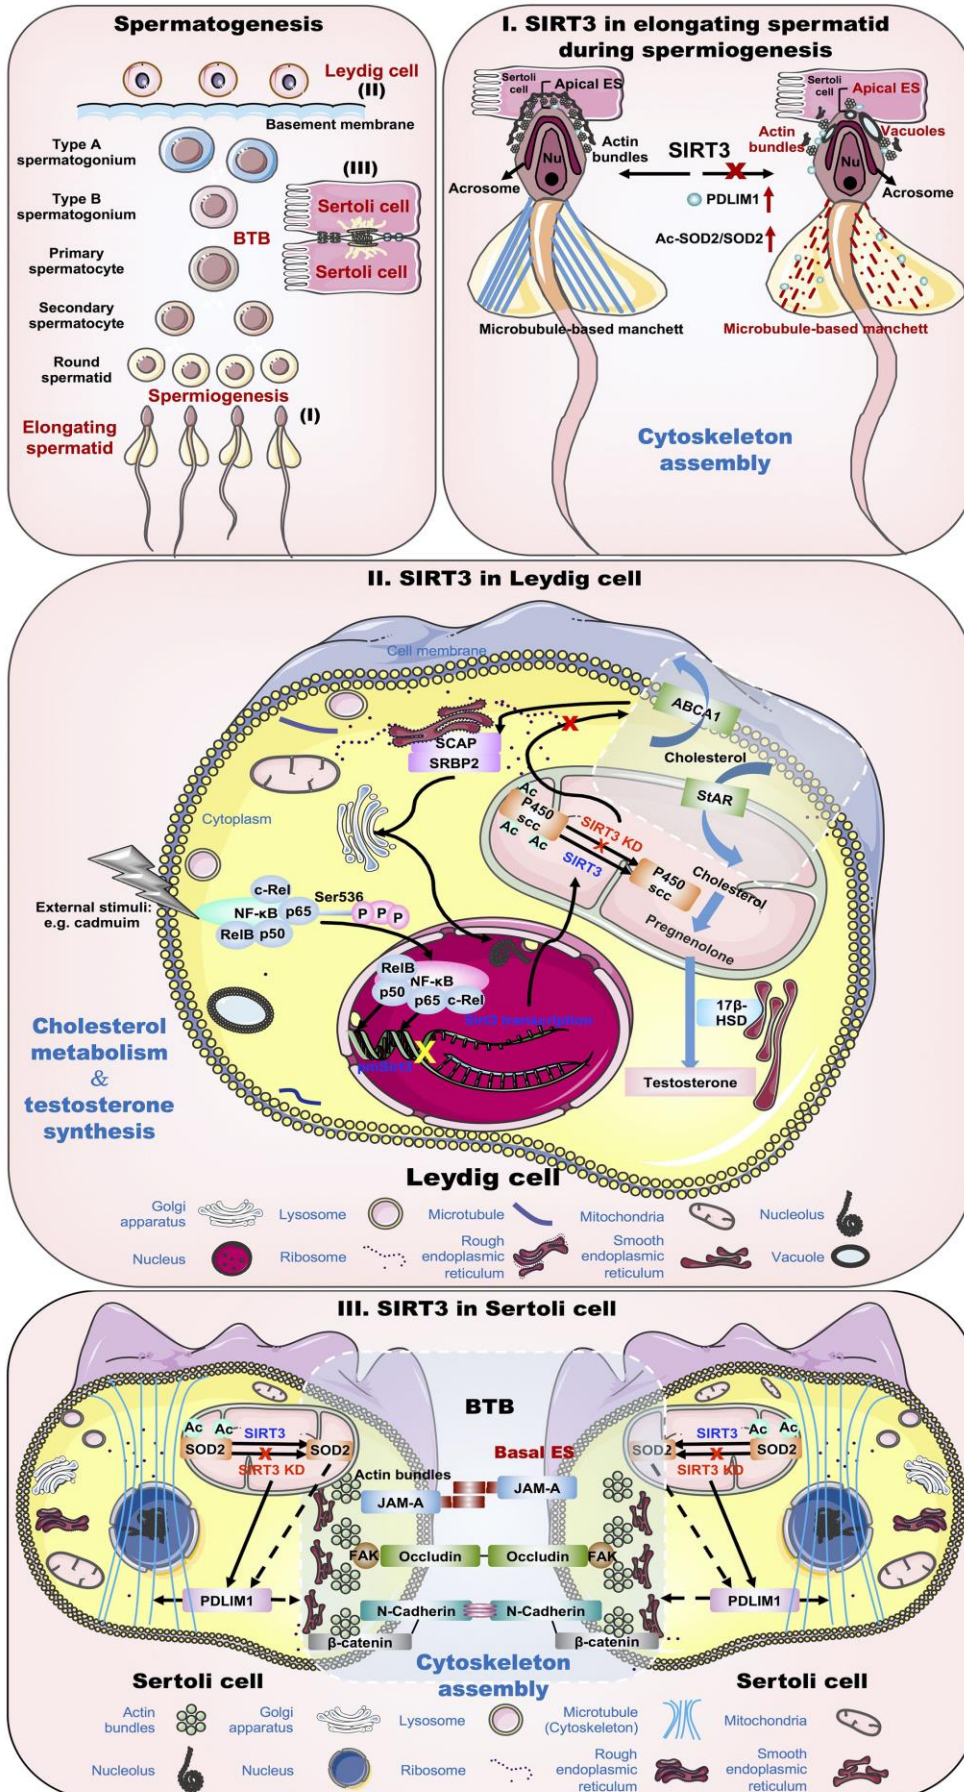



680 **Fig. 8 Summary diagram for the role of SIRT3 in testicular cells.** Mammalian  
681 spermatogenesis requires highly-coordinated Sertoli cells and Leydig cells for germ  
682 cells differentiation through mitosis, meiosis, and spermiogenesis. Here, we elucidate  
683 that SIRT3 exerts a dual role in testis: regulating cholesterol metabolism and  
684 cytoskeleton assembly during spermatogenesis. Mechanistically, in Leydig cells,  
685 phosphorylation of NF- $\kappa$ B p65<sup>Ser536</sup> stimulates the nuclear translocation of NF- $\kappa$ B  
686 molecules (subunits p50, p65, RelB), which bind to the promoter of Sirt3; particularly,  
687 p50 represses Sirt3 transcription by simultaneously binding to TFBS1 and TFBS2 in  
688 Sirt3 promoter; then, inhibited SIRT3 disturbs cholesterol metabolism markers  
689 ABCA1, StAR and P450<sub>sc</sub> deacetylation (**II**). Whereas, in Sertoli cells, SIRT3  
690 regulates SOD2 deacetylation and negative cytoskeleton protein PDLIM1 to  
691 orchestrate F-actin-containing cytoskeleton assembly, including microtubule, basal  
692 ES (Sertoli cell-Sertoli cell interface) in blood-testis barrier (BTB) via JAM-A,  
693 Occluding, N-Cadherin,  $\beta$ -catenin (**III**). SIRT3 mediates cytoskeleton assembly of  
694 elongating spermatids, including apical ES (Sertoli cell-spermatid interface), even  
695 microtubule-based manchette during spermiogenesis (**I**). To sum up, NF- $\kappa$ B-repressed  
696 SIRT3 acts directly on cholesterol metabolism of Leydig cells and cytoskeleton  
697 assembly of Sertoli cells via P450<sub>sc</sub>/SOD2 deacetylation to regulate sperm  
698 differentiation, influencing spermatogenesis, even male fertility.

699

700 Cholesterol metabolism is prerequisite for testosterone biosynthesis in testicular  
701 Leydig cells (Gao et al., 2018). In vivo study, Mel, as SIRT3 activator (Zhai et al.,  
702 2017; Zhang et al., 2017), salvaged male reproductive function injury—sperm count  
703 and motility reduction, testosterone reduction and cholesterol augment of serum in  
704 Cd-induced subfertility rats model (**Fig. 1a-f**). Cholesterol and testosterone level  
705 mirror a dynamic balance of cholesterol metabolism: biosynthesis, uptake, export and  
706 esterification (Luo et al., 2020). Our observations about cholesterol metabolism  
707 markers that Cd-induced inhibition of Abca1 (cholesterol efflux marker), Scap/Srebf2  
708 (cholesterol metabolism regulators) and Hsd17b3 (testosterone biosynthesis marker),  
709 and stimulation of Star (mitochondrial cholesterol influx transporter) were ameliorated  
710 by Mel in testis, corresponded to the changes in the level of cholesterol and testosterone.  
711 The results suggest that SIRT3 activator Mel participates in cholesterol metabolism,  
712 affecting testosterone production in testis.

713 Testosterone is essential for several crucial plots during spermatogenesis: BTB  
714 (basal ES/Sertoli-Sertoli adhesion), meiosis, apical ES (Sertoli-spermatid adhesion),  
715 and sperm release (Smith and Walker, 2014). Our data show that SIRT3 activator Mel  
716 rescued the structure disorganization of Sertoli cell, Leydig cell, and BTB induced by  
717 Cd, which accounts for the above male reproductive function injury. Apart from basal  
718 ES in BTB, cytoskeleton such as apical ES, microtubule and axoneme, are responsible  
719 for sperm head reshaping and flagella formation during spermiogenesis, promoting  
720 sperm motility acquirement (Pleuger et al., 2020). To identify whether Mel protects  
721 cytoskeleton assembly, facilitating sperm motility, we detected the dynamic process of  
722 spermiogenesis by TEM. Despite the normal axoneme, Cd undermined apical ES and  
723 microtubule-based manchette in elongating spermatids, which were alleviated by Mel.  
724 Parallely, Mel rescued F-actin-containing cytoskeleton disruption induced by Cd.  
725 Molecularly, Mel-mediated cytoskeleton assembly is concomitant with the changes in  
726 BTB markers (Occludin, JAM-A, N-cadherin) (Cheng and Mruk, 2012), apical ES–  
727 BTB axis regulators (FAK, p-FAK-Tyr407) (Cheng and Mruk, 2012), and  
728 cytoskeleton negative regulators (PDLIM1) (Shang et al., 2016). Taken together, these  
729 results echo our hypothesis that Mel engages in cytoskeleton assembly, including basal  
730 ES, apical ES, and microtubule-based manchette during spermatogenesis.

731 Upregulation of SIRT3 following Mel has been demonstrated as a protective factor  
732 in a diversity of tissues and cells, such as myocardium (Zhai et al., 2017), hepar (Song  
733 et al., 2017), cerebrum (Liu et al., 2019), which is accordant with our data that Mel  
734 indeed stimulated SIRT3, expediting SOD2 deacetylation by directly interacting with  
735 SOD2 in testis. SIRT3-SOD2 axis regulates the scavenge of ROS (Kim et al., 2017),  
736 while the balance of ROS is required for actin cytoskeletal dynamics (Gourlay and  
737 Ayscough, 2005; Hunter et al., 2018). These data hint that Mel may regulate SOD2  
738 deacetylation and cytoskeleton negative regulator PDLIM1 by SIRT3 in testicular  
739 cytoskeleton assembly.

740 Except for SOD2, Mel also regulated P450scc deacetylation by the interaction of  
741 SIRT3 and P450scc in testis. P450scc, as a catalyst converting cholesterol to  
742 pregnenolone, is indispensable for testosterone biosynthesis (Jing et al., 2020).  
743 Besides, the data showing that Mel reversed NF- $\kappa$ B p65<sup>Ser536</sup> phosphorylation in  
744 Cd-treated rat testis, is consistent with the work by Liu et al., who manifested that  
745 Mel blocked NF- $\kappa$ B p65 signal in mice adipose tissue (Liu et al., 2017b). Actually,

746 the inhibition of NF- $\kappa$ B p65 regulates testosterone production by Nur77 and SF-1  
747 (Hong et al., 2004). Therefore, P450scc acetylation and NF- $\kappa$ B p65<sup>Ser536</sup>  
748 phosphorylation are responsible for cholesterol metabolism and testosterone  
749 biosynthesis. Plus, Winnik et al. delineated that Sirt3 knockout mice failed to address  
750 a high-cholesterol diet, and resulted in endothelial cell dysfunction (Winnik et al.,  
751 2016), displaying that SIRT3 was associated with cholesterol metabolism in  
752 endothelial cells. These data and ours imply Mel may regulate NF- $\kappa$ B p65<sup>Ser536</sup>  
753 phosphorylation and P450scc deacetylation by SIRT3 in testicular cholesterol  
754 metabolism.

755 In vitro study, to confirm the role of SIRT3 in cholesterol metabolism in Leydig  
756 cells, we generated Sirt3 overexpression and knockdown models in TM3 mouse  
757 Leydig cells (TM3 cells). Like Mel, Sirt3 overexpression in TM3 cells rescued cell  
758 apoptosis and cholesterol metabolism disruption induced by Cd; however, the  
759 knockdown of Sirt3 induced cholesterol metabolism disruption similar to Cd, which  
760 failed to be rescued by Mel, revealing that Mel-mediated cholesterol metabolism was  
761 dependent on Sirt3 in TM3 cells.

762 SIRT3 dominated P450scc deacetylation in TM3 cells, which is consistent with in  
763 vivo study. Strikingly, whether Sirt3 overexpression or Sirt3 knockdown conducted  
764 no influence on NF- $\kappa$ B p65<sup>Ser536</sup> phosphorylation, despite Mel indeed reversed  
765 Cd-stimulated NF- $\kappa$ B p65<sup>Ser536</sup> phosphorylation, suggesting that Mel regulated NF- $\kappa$ B  
766 p65<sup>Ser536</sup> phosphorylation, which was not dominated by Sirt3 in TM3 cells. Since  
767 Sirt3 was not the upstream regulator of NF- $\kappa$ B, what's the relationship between  
768 NF- $\kappa$ B and Sirt3? Our data displaying that NF- $\kappa$ B p65<sup>Ser536</sup> phosphorylation  
769 stimulated nuclear translocation of NF- $\kappa$ B subunits p50, p65, and RelB, is supported  
770 by three studies pinpointing that NF- $\kappa$ B can translocate to the nucleus through Ser<sup>536</sup>  
771 phosphorylation (Yu et al., 2020). Using bioinformatics analysis, we predicted that  
772 NF- $\kappa$ B could be the upstream transcription factor of Sirt3. Our ChIP-qPCR assay  
773 demonstrated the combination between Sirt3 promoter and NF- $\kappa$ B subunits (p50, p65,  
774 RelB), especially p50. A dual-luciferase reporter assay identified that p50 repressed  
775 Sirt3 transcription by binding to TFBS1 and TFBS2 in Sirt3 promoter (**Fig 5**). In  
776 contrast, Liu et al. deemed that NF- $\kappa$ B activated SIRT3 transcription in irradiated  
777 tumor cells (Liu et al., 2015). This paradox may be caused by the different types of

778 cells. Taken together, Sirt3 transcriptional repression by NF- $\kappa$ B operates cholesterol  
779 metabolism via P450scc deacetylation in Leydig cells.

780 When it comes to cytoskeleton assembly, both basal ES (Sertoli-Sertoli cell  
781 interface) and apical ES (Sertoli-elongating spermatid interface) are associated with  
782 Sertoli cell. We investigate the role of SIRT3 in cytoskeleton assembly by Sirt3  
783 overexpression and knockdown models in TM4 mouse Sertoli cells (TM4 cells).  
784 Similar to Mel, Sirt3 overexpression rescued F-actin-containing cytoskeleton  
785 assembly disruption and cell apoptosis in Cd-treated TM4 cells; however, the  
786 knockdown of Sirt3 elicited cytoskeleton assembly disruption, which failed to be  
787 rescued by Mel, indicating that Mel-mediated cytoskeleton assembly protection was  
788 dependent on Sirt3 in TM4 cells (**Fig 6, 7**). Molecularly, SIRT3 dominates SOD2  
789 deacetylation by directly interacting with SOD2, and Mel-mediated SOD2  
790 deacetylation depends on SIRT3, in response to in vivo study. In terms of PDLIM1,  
791 both Mel and the overexpression of Sirt3 extinguished the augment of PDLIM1  
792 protein level induced by Cd; the knockdown of Sirt3 evoked PDLIM1 accumulation,  
793 impairing cytoskeleton assembly, which didn't be reversed by Mel. Additionally, the  
794 overexpression of Pdlim1 has been demonstrated to disturb cytoskeleton assembly in  
795 Sertoli cells (Liu et al., 2016). SIRT3-SOD2-mediated ROS clearance is indispensable  
796 for cytoskeleton assembly (Gourlay and Ayscough, 2005; Hunter et al., 2018). These  
797 data and ours support the assumption that SIRT3 controls cytoskeleton assembly by  
798 PDLIM1 and SOD2 deacetylation in Sertoli cells.

799 Although the knockdown of Sirt3 by shRNA exerts an effective interference in  
800 TM3 (mouse Leydig) cells and TM4 (mouse Sertoli) cells, more high-efficiency  
801 methods such as the conditional knockout (cKO) of Sirt3 in Leydig cells and Sertoli  
802 cells should be involved in future study. Our models in TM4 cells can partially  
803 respond to the ectoplasmic specialization (ES) assembly including apical/basal ES, but  
804 the phenotype about ES in Sirt3 cKO mice will be required to confirm or refute this  
805 hypothesis. Meanwhile, the accurate mechanism by which SIRT3 regulates  
806 microtubule-based manchette remains to be elucidated in elongating spermatids. In  
807 addition, the direct modes of actions between SIRT3 and cholesterol metabolism  
808 markers (Abca1, Scap/Srebf2, Hsd17b3, and Star) deserve intensive investigation,  
809 which may offer a novel orientation for exploring cholesterol metabolism during  
810 spermatogenesis.



811 Overall (**Fig. 8**), the most striking finding of this study is that **SIRT3 exerts a dual**  
812 **role in testis: Sirt3 transcriptional repression by NF- $\kappa$ B orchestrates cholesterol**  
813 **metabolism via P450scc deacetylation in Leydig cells; whereas, in Sertoli cells,**  
814 **SIRT3 regulates cytoskeleton (basal ES, microtubule) assembly via PDLIM1**  
815 **with SOD2 deacetylation; the regulation of Leydig cells and Sertoli cells may**  
816 **account for apical ES and microtubule-based manchette assembly in elongating**  
817 **spermatids, influencing sperm differentiation during spermiogenesis.** Distinct  
818 molecular mechanisms establish a novel signaling network, highlighting the complex  
819 and multi-faceted action of SIRT3 as robust deacetylase in testicular cells.  
820 Understanding the role of SIRT3 in regulating cholesterol metabolism and  
821 cytoskeleton assembly during spermatogenesis may allow for the development of  
822 additional rational combination therapies using SIRT3 activators such as Mel to  
823 improve therapies for male subfertility, even infertility.

824

## 825 **Methods**

826 **Chemicals and reagents.** Cdcl<sub>2</sub> was from Sinopharm (CFSR-10005416, Shanghai,  
827 China). Melatonin (Mel) was from MedChemExpress (Cat#HY-B0075, USA).  
828 Testosterone ELISA kit was from Goybio (Cat#GOY-088B, Shanghai, China). Total  
829 and free cholesterol assay kits were from Applygen Technologies (Cat#E1015-50,  
830 Cat#E1016-50, Beijing, China). TRIzol reagents were from Invitrogen. PrimeScript  
831 RT-PCR and SYBR Premix ExTaq Kits were from Takara (Cat#2641A, Cat#RR420,  
832 Japan). BCA protein assay and ECL kits were from Beyotime Institute of  
833 Biotechnology (Shanghai, China). N-Cadherin,  $\beta$ -Catenin, Occludin, JAM-A,  $\beta$ -Actin,  
834 SOD2, SOD2(acetyl K68), PDLIM1, NUDC, GAPDH antibodies were from Abcam  
835 (Cat#ab18203, Cat#ab68183, Cat#ab167161, Cat#ab125886, Cat#ab8226,  
836 Cat#ab13534, Cat#ab137037, Cat#ab129015, Cat#ab109318, Cat#ab37168,  
837 Cambridge, UK); FAK, p-FAK-Tyr407 antibodies were from Bioss (Cat#bs-1340R,  
838 Cat#bs-3164R, MA, USA); SIRT3, P450scc, Acetylated-Lysine, NF- $\kappa$ B p50, NF- $\kappa$ B  
839 p65, Phospho-NF- $\kappa$ B p65<sup>Ser536</sup>, RelB, c-Rel, normal IgG antibodies from Cell  
840 Signaling Technology (Cat#5490S, Cat#14217S, Cat#9441S, Cat#3035S, Cat#8242S,  
841 Cat#3033S, Cat#10544S, Cat#4727T, Cat#2729S, MA, USA). Co-IP and ChIP kits  
842 were from Thermo Fisher Scientific (Cat#26140, Cat#26156, MA, USA). CCK-8 Kit  
843 was from Dojindo (Kumamoto, Japan). An Annexin V-FITC and PI Detection Kit

844 was from BD Biosciences (New Jersey, USA). DMEM was from HyClone (Logan,  
845 Utah, USA). Collagenase and FBS were from Gibco (Australia). FITC Phalloidin  
846 FITC and TRITC Phalloidin rhodamine were from Yeasen (Cat#40735ES75,  
847 Cat#40734ES75, Shanghai, China).

848

#### 849 **Experimental design**

850 **Animal model.** 2-mo-old adult male SD rats ( $230 \pm 30$  g) were purchased from  
851 Tongji Medical College Animal Center. Animals were adapted for 7d to the new  
852 environment, and fed ad libitum. The conditions were maintained as follows: a 12-h  
853 light/dark phase, temperature ( $22\text{--}26^{\circ}\text{C}$ ) and humidity ( $50 \pm 5\%$ ). Thirty-six rats were  
854 randomly divided into 3 groups. Restricted randomization was not applied. According  
855 to our previous subfertility/infertility model (Wang et al., 2020), all rats except  
856 controls were intraperitoneally injected with  $\text{CdCl}_2$  (0.8 mg/ kg) for consecutive 7 d.  
857 Some rats were intraperitoneally injected with Mel (2 mg/kg) (SIRT3 activator (Zhai  
858 et al., 2017)(Song et al., 2017)(Liu et al., 2019)) at 2 h before Cd treatment. Given  
859 that both  $\text{CdCl}_2$  and Mel were dissolved in 0.9% NaCl, the control group was treated  
860 with 0.9% NaCl. All the animal experiments were permitted by the IACUC of Tongji  
861 Medical College, Huazhong University of Science and Technology (**Supplementary**  
862 **file**) (Permit IACUC Number: 2061), and were implemented ethically as the Guide  
863 for the Care and Use of Laboratory Animal guidelines.

864 **Cell models.** TM3 mouse Leydig cells and TM4 mouse Sertoli cells were from the  
865 Institute of Reproductive Health, Tongji Medical College. After tested for  
866 mycoplasma contamination, TM3 and TM4 cells were respectively cultured in  
867 DMEM, which was supplemented with 10% FBS, at  $37^{\circ}\text{C}$  in a humidified atmosphere  
868 with 5%  $\text{CO}_2/95\%$  air. According to our previous study (Wang et al., 2020),  $\text{IC}_{50}$  of  
869 Cd for TM3 cells— $8.725 \mu\text{g/ml}$  and  $\text{IC}_{50}$  of Cd for TM4 cells— $12 \mu\text{g/ml}$  were  
870 exploited in subsequent cell models. Considering that  $10 \mu\text{M CdCl}_2$  could be rescued  
871 by  $1 \mu\text{M Mel}$  in HepG2 cells, we determined  $1.1 \mu\text{g/ml Mel}$  to protect against  $8.725$   
872  $\mu\text{g/ml CdCl}_2$  in TM3 cells and  $1.5 \mu\text{g/ml Mel}$  to protect against  $12 \mu\text{g/ml CdCl}_2$  in  
873 TM4 cells by unit conversion (**Supplementary Table 1**).

**Supplementary Table 1. Unit conversion.**

|           | CdCl <sub>2</sub> |            | Melatonin |            |
|-----------|-------------------|------------|-----------|------------|
| TM3 cells | 8.72 µg/mL        | 47.57 µM   | 1.1 µg/mL | 4.757 µM   |
| TM4 cells | 12 µg/mL          | 65.4588 µM | 1.5 µg/mL | 6.54588 µM |

874 **Formula: Mass (mg) = Concentration (mM) \* Volume (mL) \* Molar Mass (g/mol)**

875 (<https://www.promega.com/resources/tools/biomath/molarity-calculator/>)

876

877 To explore if Mel alleviated the Cd-induced TM3 cells injury, TM3 cells were  
878 randomly divided into 3 groups in model 1: control, CdCl<sub>2</sub> (8.725 µg/ml), CdCl<sub>2</sub> (8.725  
879 µg/ml) with Mel (1.1 µg/ml). To identify if SIRT3 alleviated the Cd-induced TM3  
880 cells injury, TM3 cells were randomly divided into 4 groups in model 2: control,  
881 CdCl<sub>2</sub> (8.725 µg/ml), Sirt3 overexpression (Ad-Sirt3), CdCl<sub>2</sub> (8.725 µg/ml) with Sirt3  
882 overexpression (Ad-Sirt3). To examine if Mel-mediated cell protection was  
883 dependent on SIRT3, TM3 cells were randomly divided into 4 groups in model 3:  
884 control, Mel (1.1 µg/ml), Sirt3 knockdown (sh-Sirt3), Mel (1.1 µg/ml) with Sirt3  
885 knockdown (sh-Sirt3).

886 In parallel, to investigate the role of SIRT3 in TM4 cells, TM4 cells were randomly  
887 divided into 3 models—TM4-model 1: control, CdCl<sub>2</sub> (12 µg/ml), CdCl<sub>2</sub> (12 µg/ml)  
888 with Mel (1.5 µg/ml); TM4-model 2: control, CdCl<sub>2</sub> (12 µg/ml), Sirt3 overexpression  
889 (Ad-Sirt3), CdCl<sub>2</sub> (12 µg/ml) with Sirt3 overexpression (Ad-Sirt3); TM4-model 3:  
890 control, Mel (1.5 µg/ml), Sirt3 knockdown (sh-Sirt3), Mel (1.5 µg/ml) with Sirt3  
891 knockdown (sh-Sirt3).

892 24 h post Ad-Sirt3 or sh-Sirt3 transfection, some cells were exposed to Cd for 24 h.  
893 Some cells were pretreated with Mel for 2 h prior to Cd treatment. Researchers and  
894 statistical analysts were blind to the allocation of groups.

895

896 **Sirt3 overexpression and knockdown by adenovirus vectors.** Mouse Sirt3  
897 (NM\_001177804.1) overexpression adenovirus were synthesized by a  
898 pAdM-FH-GFP vector (Vigene Biosciences) (**Supplementary Fig.1a**). The construct  
899 was confirmed by DNA sequencing. Sirt3 knockdown adenovirus was designed  
900 according to four sequences of shRNA as follows: (5' → 3' orientation)  
901 Sirt3-shRNA1: GGCTCTATA

902 CACAGAACATCGTTCAAGAGACGATGTTCTGTGTATAGAGCCTTTTTT;  
 903 Sirt3-shRNA2: GGCAATCTAGCATGTTGATCGTTCAAGAGACG  
 904 ATCAACATG CTAGATTGCCTTTTTT; Sirt3-shRNA3:  
 905 AGACAGCTCCAACACGTTTACTTCA  
 906 AGAGAGTAAACGTGTTGGAGCTGTCTTTTTTT; Sirt3-shRNA4: GCGTTGTGA  
 907 AACCCGACATTGTTCAAGAGACAATGTCGGGTTTCACAACGCTTTTTT,  
 908 which were constructed in a pAdM-4in1-shRNA-GFP vector (Vigene Biosciences)  
 909 (**Supplementary Fig.1b**). Sirt3 overexpression and knockdown adenoviruses were  
 910 respectively transfected into TM3 cells or TM4 cells with ADV-HR (FH880805)  
 911 (Vigene Biosciences) for the Sirt3 overexpression or knockdown assay. The  
 912 efficiencies of Sirt3 overexpression and knockdown were examined in TM3 cells and  
 913 TM4 cells (**supplementary Fig. 1c, 1d**).

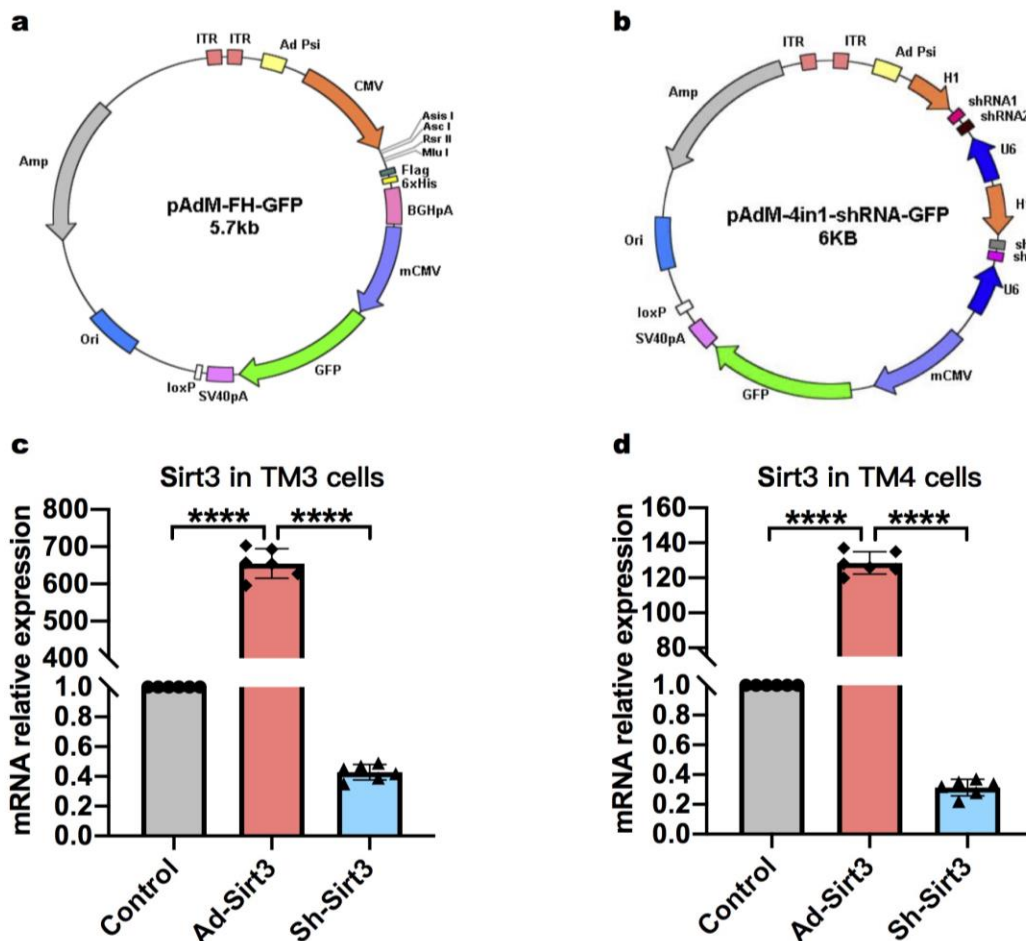

914  
 915

916 **Supplementary Fig. 1** The efficiency of Sirt3 overexpression or knockdown in  
 917 **TM3 cells and TM4 cells.** **a** The adenovirus vector for Sirt3 overexpression. **b** The  
 918 shRNA-containing adenovirus vector for Sirt3 knockdown. **c** The efficiency of Sirt3

919 overexpression and knockdown in TM3 cells by mRNA expression level analysis. **d**  
 920 The efficiency of Sirt3 overexpression and knockdown in TM4 cells by mRNA  
 921 expression level analysis. \*\*\*\* $p < 0.0001$ .

922

923 **Plasmid constructions.** Mouse Nfkb1 (NM\_008689.2) coding sequence was  
 924 synthesized by gene synthesis (General Bio), and cloned into the pcDNA3.1  
 925 eukaryotic expression vector (**Supplementary Fig. 5a**). Sirt3-WT promoter and the  
 926 mutant promoters Sirt3-MUT1 (deletion of TFBS1), Sirt3-MUT2 (deletion of TFBS2),  
 927 Sirt3-MUT3 (simultaneous deletion of TFBS1 and TFBS2) (**Fig. 5f**) were constructed  
 928 by PCR-based amplification and cloned into pGL3-Promoter vector (**Supplementary**  
 929 **Fig. 5b**). Sequences of the primers for amplification of promoters are shown in  
 930 **Supplementary Table 3**. All constructs were confirmed by DNA sequencing  
 931 (**Available from authors**). NF- $\kappa$ B1 protein coding capacity in HEK293T cells was  
 932 tested by western blot assay (**Supplementary Fig. 5d**).

**Supplementary Table 3. Sequences of the primers for amplification of promoter.**

| Gene<br>Symbol                           | Primers (5'-3')                                   |                                                  |
|------------------------------------------|---------------------------------------------------|--------------------------------------------------|
|                                          | Forward                                           | Reverse                                          |
| <b>In ChIP-qRT PCR</b>                   |                                                   |                                                  |
| Sirt3                                    | GTTCTGAGGAAGAGGTGTTTTTTC                          | CTGACTGCTTAGTGCTTGTGTTGT                         |
| <b>In Dual luciferase reporter assay</b> |                                                   |                                                  |
| Sirt3<br>(WT)                            | gcgtgctagcccgggctcgagCCATTGGCCCC<br>TTTTGGT       | atgcagatcgagatctcgagCTCCCGGACCCC<br>ACAGTC       |
| Sirt3<br>(MUT1)                          | TCAAACACCAAGGTCCCACTGCAC<br>AGCCAGGAG             | TCAAACACCAAGGTCCCACTGCACA<br>GCCAGGAG            |
| Sirt3<br>(MUT2)                          | GGGCATGCTGAAATATTAATACTA<br>GCCTCACGGGTTGCGGTCGTC | TGAGGCTAGTTTTAATATTCAGCA<br>TGCCCCGCGCGCCCCGCGGT |

933



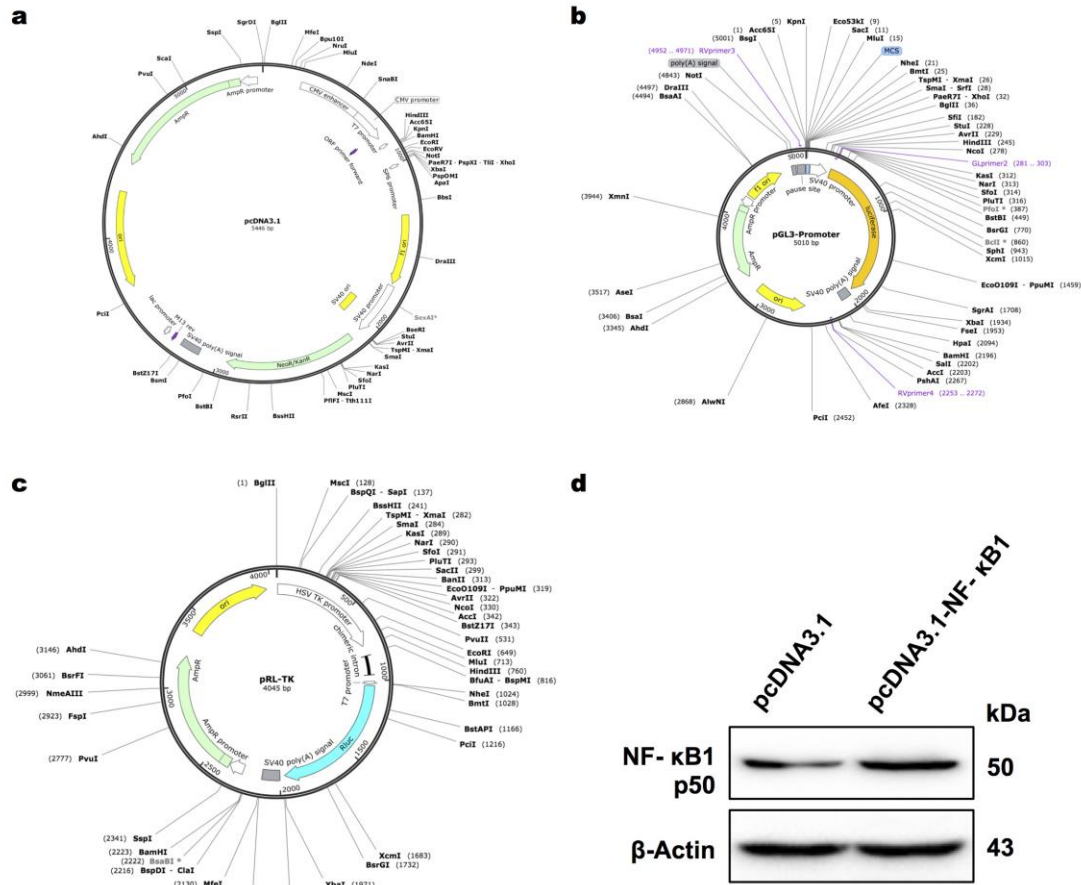

934

935 **Supplementary Fig. 5** Plasmid constructions for dual luciferase reporter assay. a  
 936 pcDNA3.1 eukaryotic expression vector for overexpression of NF-κB1 in HEK293T  
 937 cells. b pGL3-Promoter vector for insertion of Sirt3 wild-type or mutant promoter in  
 938 HEK293T cells. c pRL-TK vector as an internal control for transfection. d NF-κB1  
 939 protein coding capacity in HEK293T cells by western blot assay.

940

941 **Dual-luciferase reporter assay.** By Lipofectamine® 3000 transfection reagent  
 942 (Invitrogen), HEK293T cells (from Tongji Medical College) were transiently  
 943 transfected with the NF-κB p50 expression vector (pcDNA3.1- NF-κB), or empty  
 944 control vector as well as WT or TFBS1/TFBS2 mutant Sirt3 promoter  
 945 (MUT1/MUT2/MUT3) luciferase reporter vector (pGL3-Promoter) and Renilla  
 946 luciferase-reporter vector (pRL-TK, as an internal control for transfection)  
 947 (**Supplementary Fig. 5c**). Luciferase activities were determined after 24-h incubation  
 948 with the Dual-luciferase reporter assay system (Promega). The firefly luciferase  
 949 activity was normalized to renilla luciferase activity. The relative luciferase activity  
 950 was analyzed as a function of NF-κB p50-dependent Sirt3 transcription.

951

952 **Chromatin immunoprecipitation (ChIP) assay.** The ChIP assay was implemented  
953 by a ChIP assay kit according to the manufacturer's instructions (Thermo Fisher  
954 Scientific). 1% formaldehyde was utilized to cross-link the histones and genomic  
955 DNA in TM3 mouse Leydig cells. Cell lysates were prepared, and chromosomal  
956 DNA was sonicated to obtain average sizes between 200 and 1000 bp. The chromatin  
957 was incubated and precipitated with antibodies against p50, p65, RelB or normal  
958 rabbit IgG (CST) as controls at 4 °C overnight. DNA fragment that contained the  
959 NF- $\kappa$ B binding site of the Sirt3 promoter was amplified. The amplified products were  
960 analyzed by quantitative real-time PCR.

961

962 **Sperm parameter analysis.** According to "WHO laboratory manual for the  
963 examination and processing of human semen (Fifth edition, 2010)", the sperm count  
964 was calculated by multiplying the semen volume and concentration, which was  
965 measured via an improved Neubauer hemocytometer. Sperm motility was analyzed  
966 through the progressive sperm count per 200 sperm under a microscope.

967

968 **Cd level in the testis.** Cd level in testis was detected by graphite furnace atomic  
969 absorption spectrometry (GFAAS) as the previous method (Wang et al., 2020).

970

971 **Testosterone and cholesterol levels.** Testosterone levels in rat serum and cultured  
972 TM3 cells supernatants were qualified by testosterone ELISA kit following the  
973 manufacturer's instructions (Goybio). Total cholesterol (TC) levels in testis and TM3  
974 cells were measured by total cholesterol assay kit; free cholesterol (FC) levels were  
975 determined by free cholesterol assay kit according to the manufacturer's instructions  
976 (Applygen Technologies).

977

978 **Quantitative real-time PCR assay.** The mRNA expression levels of Abca1, Hmgcr,  
979 Hmgcs1, Hsd17b1, Scap, Srebf2, Star in testis and TM3 cells, and Sirt3 in TM3/TM4  
980 cells were analyzed by quantitative real-time PCR assay. SYBR RT-PCR kit (Takara)  
981 and LightCycler (Roche) were exploited according to the standard procedures. Data  
982 were normalized to  $\beta$ -actin expression. Sequences of the primers for quantitative  
983 RT-PCR are in **supplementary Table 2**.

**Supplementary Table 2. Sequences of the primers for quantitative real time PCR of mRNA levels.**

| Gene<br>Symbol | Primers (5'-3')      |                        |
|----------------|----------------------|------------------------|
|                | Forward              | Reverse                |
| $\beta$ -Actin | CTGAGAGGGAAATCGTGCGT | CCACAGGATTCCATACCCAAGA |
| Abca1          | GAGACCAACCAGGCAATCCA | GCCCAGAACTTCCTCTCGTC   |
| Hmgcr          | CCATCGAGCCACGACCTAAT | AGCTGGGATATGCTTGGCATT  |
| Hmgcs1         | GGGCCAAACGCTCCTCTAAT | ACAGGGTACTCGGAGAGCAT   |
| Hsd17b1        | AGTTTGCCTCGAAGGTTTG  | CATCTGCTCGTTCCAGAGCC   |
| Scap           | AGACCCATGGCGACATTACC | CCCATAATTACGCGGGCAGA   |
| Srebf2         | CGGTGGAGTCCTTGGTGAAA | ACGGAACTGCTGGAGAATGG   |
| Star           | AGTGACCAGGAGCTGTCCTA | TTAGCACTTCGTCCCCGTTC   |
| Sirt3          | CATCGACGGGCTTGAGAGAG | TTACAAAGGTCCCCTGGGC    |

984

985

986 **Histopathological analyses.** Testes were fixed in Bouin's fixative for 24 h, and  
987 embedded in paraffin, and sectioned. Testes sections were stained with hematoxylin  
988 and eosin (H&E) and observed under a light microscope for structure.

989

990 **Transmission electron microscopy (TEM).** Testes were fixed with 2.5%  
991 glutaraldehyde for 2 h at 4 °C, postfixed in 1% osmium tetroxide, and embedded in  
992 Epon 812 as the previous method (Wang et al., 2020); the ultrastructure of Sertoli cell,  
993 Leydig cell, BTB, and cytoskeleton during spermiogenesis in testis was investigated  
994 by TEM (JEM 1200-EX; Hitachi, Ltd, Tokyo, Japan) at 80 kV.

995

996 **F-actin examination by immunofluorescence and confocal microscopy.** Fixed  
997 testis sections were stained with FITC Phalloidin FITC (Yeasen), which labeled  
998 F-actin. TM4 cells were washed and fixed with 4% paraformaldehyde, and then  
999 stained with TRITC Phalloidin rhodamine (Yeasen), which labeled F-actin. Under  
1000 Nikon A1 laser scanning confocal microscope (Nikon America Inc., Melville, NY),  
1001 F-actin structure was investigated. The percentages of spermatids or Sertoli cells with  
1002 abnormal F-actin-containing cytoskeleton per 200 elongating spermatids or TM4 cells  
1003 were calculated in 6 independent experiments for each group.

1004

1005 **Western blotting.** The protein concentration was detected by a BCA protein assay kit.  
1006 Proteins were denatured, separated on SDS-PAGE gels, and transferred to a PVDF  
1007 membrane as the previous method (Wang et al., 2020). The membranes were  
1008 incubated with antibodies according to the manufacturer's instructions, including  
1009 N-Cadherin,  $\beta$ -Catenin, Occludin, JAM-A,  $\beta$ -Actin, SOD2, SOD2(acetyl K68),  
1010 PDLIM1, NUDC, GAPDH, FAK, p-FAK-Tyr407, SIRT3, P450<sup>scc</sup>,  
1011 Acetylated-Lysine, NF- $\kappa$ B p50, NF- $\kappa$ B p65, Phospho-NF- $\kappa$ B p65<sup>Ser536</sup>, RelB, c-Rel.  
1012  $\beta$ -Actin and GAPDH proteins were used as a loading control for total and cytoplasmic  
1013 proteins respectively. The membranes were incubated with corresponding secondary  
1014 antibodies; the target proteins were detected with ECL; the density was analyzed by  
1015 Image J.

1016

1017 **Co-immunoprecipitation (Co-IP) assay.** co-IP was performed by the Thermo  
1018 Scientific Pierce co-IP kit according to the manufacturer's protocol (Thermo Fisher  
1019 Scientific). For the detection of interaction between SOD2 and SIRT3, 60  $\mu$ l of  
1020 anti-SOD2 antibody, 60  $\mu$ l of anti-SIRT3 antibody, and 30  $\mu$ l of IgG antibody were first  
1021 immobilized for 2 h using AminoLink Plus coupling resin, which was washed and then  
1022 incubated with 200  $\mu$ l (500  $\mu$ g of proteins) of lysate. Next, the resin was precleaned  
1023 with control agarose resin for 1 h and incubated. Using the elution buffer, the coupling  
1024 resin was again washed and protein was eluted. For the detection of interaction between  
1025 P450<sup>scc</sup> and SIRT3, the method was as above. Samples were analyzed by  
1026 immunoblotting.

1027

1028 **CCK-8 assay.** Cell viabilities of TM3 and TM4 cells were assessed by CCK-8 assay  
1029 kit according to the manufacturer's instructions as the previous method (Wang et al.,  
1030 2020).

1031

1032 **Flow cytometry analysis.** To analyze the effects of the indicated treatments on cell  
1033 survival, we stained the cells with an Annexin V-FITC and PI Detection Kit and  
1034 analyzed them by flow cytometry; flow cytometry data were assessed using BD  
1035 FACSDiva Software v7.0 (Becton-Dickinson, USA) (Wang et al., 2020).

1036



1037 **Statistical analysis.** The data were expressed as the mean  $\pm$  S.D. Differences among  
1038 two groups were analyzed by Student's *t*-test, the Mann–Whitney *U*-test, or  
1039 Generalized estimating equation (if non-normal distribution). Differences among  
1040 multiple groups were analyzed by one-way analysis of variance (ANOVA). Multiple  
1041 comparisons for subgroups were determined by Dunnett's T3 tests. Statistical  
1042 significance was considered as follows: NS,  $p > 0.05$ ; \*, &, #,  $p < 0.05$ ; \*\* $p < 0.01$ ;  
1043 \*\*\* $p < 0.001$ ; \*\*\*\* $p < 0.0001$ . The showed experiments were replicated 4-10 times.

1044

#### 1045 **Data availability**

1046 All data generated or analyzed during this study are included in the manuscript and  
1047 supporting files. Source data files have been provided for Figures 1-7 and  
1048 supplementary files.

1049

#### 1050 **Acknowledgements**

1051 The authors thank the Editors and Reviewers for their significant contributions during  
1052 the revision period. This study was supported by National Key R&D Program of  
1053 China (No. 2020YFA0803900), Hubei Science and Technology Plan (No.  
1054 2017ACB640), and Wuhan University Medical Development Plan (No.  
1055 TFJC2018001).

1056

#### 1057 **Author contributions**

1058 M.W, Y.Z.Z. and P.S. conceived the project and designed the experiments; M.W.,  
1059 L.Z., Y.X., X.F.W., L.C. performed the experiments; M.W, F.W., analyzed the data,  
1060 and wrote the paper; M.W., and Y.X. edited the manuscript; Y.Z.Z. and P.S.  
1061 supervised the study; Y.Z.Z. obtained fundings for the work.

1062

#### 1063 **Declaration of interest**

1064 The authors report no conflicts of interest.

1065

#### 1066 **References**

1067 Bauer, K., M. Kratzer, M. Otte, K.L. de Quintana, J. Hagmann, G.J. Arnold, C.  
1068 Eckerskorn, F. Lottspeich, and W. Siess. Human CLP36, a PDZ-domain and  
1069 LIM-domain protein, binds to alpha-actinin-1 and associates with actin

- 1070 filaments and stress fibers in activated platelets and endothelial cells.  
1071 *Blood*.2000;96:4236-4245.
- 1072 Chen, N., P. Su, M. Wang, and Y.M. Li. Ascorbic acid inhibits cadmium-induced  
1073 disruption of the blood-testis barrier by regulating oxidative stress-mediated  
1074 p38 MAPK pathways. *Environ Sci Pollut Res Int*.2018a;25:21713-21720.  
1075 <https://doi.org/10.1007/s11356-018-2138-4>.
- 1076 Chen, T., S.H. Dai, X. Li, P. Luo, J. Zhu, Y.H. Wang, Z. Fei, and X.F. Jiang.  
1077 Sirt1-Sirt3 axis regulates human blood-brain barrier permeability in response  
1078 to ischemia. *Redox Biol*.2018b;14:229-236.  
1079 <https://doi.org/10.1016/j.redox.2017.09.016>.
- 1080 Cheng, C.Y., and D.D. Mruk. The blood-testis barrier and its implications for male  
1081 contraception. *Pharmacol Rev*.2012;64:16-64.  
1082 <https://doi.org/10.1124/pr.110.002790>.
- 1083 Das, A., M.S. Brown, D.D. Anderson, J.L. Goldstein, and A. Radhakrishnan. Three  
1084 pools of plasma membrane cholesterol and their relation to cholesterol  
1085 homeostasis. *Elife*.2014;3. <https://doi.org/10.7554/eLife.02882>.
- 1086 Deng, S.L., S.R. Chen, Z.P. Wang, Y. Zhang, J.X. Tang, J. Li, X.X. Wang, J.M.  
1087 Cheng, C. Jin, X.Y. Li, B.L. Zhang, K. Yu, Z.X. Lian, G.S. Liu, and Y.X. Liu.  
1088 Melatonin promotes development of haploid germ cells from early developing  
1089 spermatogenic cells of Suffolk sheep under in vitro condition. *J Pineal*  
1090 *Res*.2016;60:435-447. <https://doi.org/10.1111/jpi.12327>.
- 1091 Gao, F., G. Li, C. Liu, H. Gao, H. Wang, W. Liu, M. Chen, Y. Shang, L. Wang, J. Shi,  
1092 W. Xia, J. Jiao, F. Gao, J. Li, L. Chen, and W. Li. Autophagy regulates  
1093 testosterone synthesis by facilitating cholesterol uptake in Leydig cells. *J Cell*  
1094 *Biol*.2018;217:2103-2119. <https://doi.org/10.1083/jcb.201710078>.
- 1095 Garolla, A., M. Torino, B. Sartini, I. Cosci, C. Patassini, U. Carraro, and C. Foresta.  
1096 Seminal and molecular evidence that sauna exposure affects human  
1097 spermatogenesis. *Hum Reprod*.2013;28:877-885.  
1098 <https://doi.org/10.1093/humrep/det020>.
- 1099 Gourlay, C.W., and K.R. Ayscough. The actin cytoskeleton: a key regulator of  
1100 apoptosis and ageing? *Nat Rev Mol Cell Biol*.2005;6:583-589.  
1101 <https://doi.org/10.1038/nrm1682>.

- 1102 Griswold, M.D. Spermatogenesis: The Commitment to Meiosis. *Physiol*  
1103 *Rev.*2016;96:1-17. <https://doi.org/10.1152/physrev.00013.2015>.
- 1104 Heo, J., J. Lim, S. Lee, J. Jeong, H. Kang, Y. Kim, J.W. Kang, H.Y. Yu, E.M. Jeong,  
1105 K. Kim, M. Kucia, S.J. Waigel, W. Zacharias, Y. Chen, I.G. Kim, M.Z.  
1106 Ratajczak, and D.M. Shin. Sirt1 Regulates DNA Methylation and  
1107 Differentiation Potential of Embryonic Stem Cells by Antagonizing Dnmt3l.  
1108 *Cell Rep.*2017;18:1930-1945. <https://doi.org/10.1016/j.celrep.2017.01.074>.
- 1109 Hong, C.Y., J.H. Park, R.S. Ahn, S.Y. Im, H.S. Choi, J. Soh, S.H. Mellon, and K. Lee.  
1110 Molecular mechanism of suppression of testicular steroidogenesis by  
1111 proinflammatory cytokine tumor necrosis factor alpha. *Mol Cell*  
1112 *Biol.*2004;24:2593-2604. <https://doi.org/10.1128/mcb.24.7.2593-2604.2004>.
- 1113 Hor, J.H., M.M. Santosa, V.J.W. Lim, B.X. Ho, A. Taylor, Z.J. Khong, J. Ravits, Y.  
1114 Fan, Y.C. Liou, B.S. Soh, and S.Y. Ng. ALS motor neurons exhibit hallmark  
1115 metabolic defects that are rescued by SIRT3 activation. *Cell Death*  
1116 *Differ.*2020. <https://doi.org/10.1038/s41418-020-00664-0>.
- 1117 Hsu, H.J., M.R. Liang, C.T. Chen, and B.C. Chung. Pregnenolone stabilizes  
1118 microtubules and promotes zebrafish embryonic cell movement.  
1119 *Nature.*2006;439:480-483. <https://doi.org/10.1038/nature04436>.
- 1120 Huang, Z., J.K. Zhou, K. Wang, H. Chen, S. Qin, J. Liu, M. Luo, Y. Chen, J. Jiang, L.  
1121 Zhou, L. Zhu, J. He, J. Li, W. Pu, Y. Gong, J. Li, Q. Ye, D. Dong, H. Hu, Z.  
1122 Zhou, L. Dai, C. Huang, X. Wei, and Y. Peng. PDLIM1 Inhibits Tumor  
1123 Metastasis Through Activating Hippo Signaling in Hepatocellular Carcinoma.  
1124 *Hepatology.*2020;71:1643-1659. <https://doi.org/10.1002/hep.30930>.
- 1125 Hunter, M.V., P.M. Willoughby, A.E.E. Bruce, and R. Fernandez-Gonzalez.  
1126 Oxidative Stress Orchestrates Cell Polarity to Promote Embryonic Wound  
1127 Healing. *Dev Cell.*2018;47:377-387 e374.  
1128 <https://doi.org/10.1016/j.devcel.2018.10.013>.
- 1129 Jing, J., N. Ding, D. Wang, X. Ge, J. Ma, R. Ma, X. Huang, K. Jueraitetibaike, K.  
1130 Liang, S. Wang, S. Cao, A.Z. Zhao, and B. Yao. Oxidized-LDL inhibits  
1131 testosterone biosynthesis by affecting mitochondrial function and the p38  
1132 MAPK/COX-2 signaling pathway in Leydig cells. *Cell Death*  
1133 *Dis.*2020;11:626. <https://doi.org/10.1038/s41419-020-02751-z>.

- 1134 Kim, H., Y.D. Lee, H.J. Kim, Z.H. Lee, and H.H. Kim. SOD2 and Sirt3 Control  
1135 Osteoclastogenesis by Regulating Mitochondrial ROS. *J Bone Miner*  
1136 *Res.*2017;32:397-406. <https://doi.org/10.1002/jbmr.2974>.
- 1137 Li, D., E.B. Dammer, and M.B. Sewer. Resveratrol stimulates cortisol biosynthesis by  
1138 activating SIRT-dependent deacetylation of P450<sub>scc</sub>.  
1139 *Endocrinology.*2012;153:3258-3268. <https://doi.org/10.1210/en.2011-2088>.
- 1140 Li, X., Z. Wang, Z. Jiang, J. Guo, Y. Zhang, C. Li, J. Chung, J. Folmer, J. Liu, Q.  
1141 Lian, R. Ge, B.R. Zirkin, and H. Chen. Regulation of seminiferous  
1142 tubule-associated stem Leydig cells in adult rat testes. *Proc Natl Acad Sci U S*  
1143 *A.*2016;113:2666-2671. <https://doi.org/10.1073/pnas.1519395113>.
- 1144 Liu, C., Z. Song, L. Wang, H. Yu, W. Liu, Y. Shang, Z. Xu, H. Zhao, F. Gao, J. Wen,  
1145 L. Zhao, Y. Gui, J. Jiao, F. Gao, and W. Li. Sirt1 regulates acrosome  
1146 biogenesis by modulating autophagic flux during spermiogenesis in mice.  
1147 *Development.*2017a;144:441-451. <https://doi.org/10.1242/dev.147074>.
- 1148 Liu, C., H. Wang, Y. Shang, W. Liu, Z. Song, H. Zhao, L. Wang, P. Jia, F. Gao, Z.  
1149 Xu, L. Yang, F. Gao, and W. Li. Autophagy is required for ectoplasmic  
1150 specialization assembly in sertoli cells. *Autophagy.*2016;12:814-832.  
1151 <https://doi.org/10.1080/15548627.2016.1159377>.
- 1152 Liu, L., H. Chen, J. Jin, Z. Tang, P. Yin, D. Zhong, and G. Li. Melatonin ameliorates  
1153 cerebral ischemia/reperfusion injury through SIRT3 activation. *Life*  
1154 *Sci.*2019;239:117036. <https://doi.org/10.1016/j.lfs.2019.117036>.
- 1155 Liu, R., M. Fan, D. Candas, L. Qin, X. Zhang, A. Eldridge, J.X. Zou, T. Zhang, S.  
1156 Juma, C. Jin, R.F. Li, J. Perks, L.Q. Sun, A.T. Vaughan, C.X. Hai, D.R. Gius,  
1157 and J.J. Li. CDK1-Mediated SIRT3 Activation Enhances Mitochondrial  
1158 Function and Tumor Radioresistance. *Mol Cancer Ther.*2015;14:2090-2102.  
1159 <https://doi.org/10.1158/1535-7163.MCT-15-0017>.
- 1160 Liu, Z., L. Gan, Y. Xu, D. Luo, Q. Ren, S. Wu, and C. Sun. Melatonin alleviates  
1161 inflammasome-induced pyroptosis through inhibiting NF-kappaB/GSDMD  
1162 signal in mice adipose tissue. *J Pineal Res.*2017b;63.  
1163 <https://doi.org/10.1111/jpi.12414>.
- 1164 Luo, J., H. Yang, and B.L. Song. Mechanisms and regulation of cholesterol  
1165 homeostasis. *Nat Rev Mol Cell Biol.*2020;21:225-245.  
1166 <https://doi.org/10.1038/s41580-019-0190-7>.

- 1167 Mai, W., Y. Xu, J. Xu, D. Zhao, L. Ye, G. Yu, Z. Wang, Q. Lu, J. Lin, T. Yang, C.  
1168 Gu, S. Liu, Y. Zhong, and H. Yang. Berberine Inhibits Nod-Like Receptor  
1169 Family Pyrin Domain Containing 3 Inflammasome Activation and Pyroptosis  
1170 in Nonalcoholic Steatohepatitis via the ROS/TXNIP Axis. *Front*  
1171 *Pharmacol.*2020;11:185. <https://doi.org/10.3389/fphar.2020.00185>.
- 1172 Makela, J.A., J.J. Koskenniemi, H.E. Virtanen, and J. Toppari. Testis Development.  
1173 *Endocr Rev.*2019;40:857-905. <https://doi.org/10.1210/er.2018-00140>.
- 1174 Marshall, K.E., E.L. Godden, F. Yang, S. Burgers, K.J. Buck, and J.M. Sikela. In  
1175 silico discovery of gene-coding variants in murine quantitative trait loci using  
1176 strain-specific genome sequence databases. *Genome*  
1177 *Biol.*2002;3:RESEARCH0078.  
1178 <https://doi.org/10.1186/gb-2002-3-12-research0078>.
- 1179 Mruk, D.D., and C.Y. Cheng. The Mammalian Blood-Testis Barrier: Its Biology and  
1180 Regulation. *Endocr Rev.*2015;36:564-591.  
1181 <https://doi.org/10.1210/er.2014-1101>.
- 1182 O'Donnell, L., K. Pratis, A. Wagenfeld, U. Gottwald, J. Muller, G. Leder, R.I.  
1183 McLachlan, and P.G. Stanton. Transcriptional profiling of the  
1184 hormone-responsive stages of spermatogenesis reveals cell-, stage-, and  
1185 hormone-specific events. *Endocrinology.*2009;150:5074-5084.  
1186 <https://doi.org/10.1210/en.2009-0755>.
- 1187 Palomer, X., M.S. Roman-Azcona, J. Pizarro-Delgado, A. Planavila, F. Villarroya, B.  
1188 Valenzuela-Alcaraz, F. Crispi, A. Sepulveda-Martinez, I. Miguel-Escalada, J.  
1189 Ferrer, J.F. Nistal, R. Garcia, M.M. Davidson, E. Barroso, and M.  
1190 Vazquez-Carrera. SIRT3-mediated inhibition of FOS through histone H3  
1191 deacetylation prevents cardiac fibrosis and inflammation. *Signal Transduct*  
1192 *Target Ther.*2020;5:14. <https://doi.org/10.1038/s41392-020-0114-1>.
- 1193 Pellegrini, L., B. Pucci, L. Villanova, M.L. Marino, G. Marfe, L. Sansone, E.  
1194 Vernucci, D. Bellizzi, V. Reali, M. Fini, M.A. Russo, and M. Tafani. SIRT3  
1195 protects from hypoxia and staurosporine-mediated cell death by maintaining  
1196 mitochondrial membrane potential and intracellular pH. *Cell Death*  
1197 *Differ.*2012;19:1815-1825. <https://doi.org/10.1038/cdd.2012.62>.



- 1198 Pleuger, C., M.S. Lehti, J.E. Dunleavy, D. Fietz, and M.K. O'Bryan. Haploid male  
1199 germ cells-the Grand Central Station of protein transport. *Hum Reprod*  
1200 *Update*.2020;26:474-500. <https://doi.org/10.1093/humupd/dmaa004>.
- 1201 Rubinow, K.B. An intracrine view of sex steroids, immunity, and metabolic  
1202 regulation. *Mol Metab*.2018;15:92-103.  
1203 <https://doi.org/10.1016/j.molmet.2018.03.001>.
- 1204 Shang, Y., H. Wang, P. Jia, H. Zhao, C. Liu, W. Liu, Z. Song, Z. Xu, L. Yang, Y.  
1205 Wang, and W. Li. Autophagy regulates spermatid differentiation via  
1206 degradation of PDLIM1. *Autophagy*.2016;12:1575-1592.  
1207 <https://doi.org/10.1080/15548627.2016.1192750>.
- 1208 Smith, L.B., and W.H. Walker. The regulation of spermatogenesis by androgens.  
1209 *Semin Cell Dev Biol*.2014;30:2-13.  
1210 <https://doi.org/10.1016/j.semcdb.2014.02.012>.
- 1211 Song, C., J. Zhao, B. Fu, D. Li, T. Mao, W. Peng, H. Wu, and Y. Zhang.  
1212 Melatonin-mediated upregulation of Sirt3 attenuates sodium fluoride-induced  
1213 hepatotoxicity by activating the MT1-PI3K/AKT-PGC-1alpha signaling  
1214 pathway. *Free Radic Biol Med*.2017;112:616-630.  
1215 <https://doi.org/10.1016/j.freeradbiomed.2017.09.005>.
- 1216 Tao, R., M.C. Coleman, J.D. Pennington, O. Ozden, S.H. Park, H. Jiang, H.S. Kim,  
1217 C.R. Flynn, S. Hill, W. Hayes McDonald, A.K. Olivier, D.R. Spitz, and D.  
1218 Gius. Sirt3-mediated deacetylation of evolutionarily conserved lysine 122  
1219 regulates MnSOD activity in response to stress. *Mol Cell*.2010;40:893-904.  
1220 <https://doi.org/10.1016/j.molcel.2010.12.013>.
- 1221 Wang, M., X.F. Wang, Y.M. Li, N. Chen, Y. Fan, W.K. Huang, S.F. Hu, M. Rao, Y.Z.  
1222 Zhang, and P. Su. Cross-talk between autophagy and apoptosis regulates  
1223 testicular injury/recovery induced by cadmium via PI3K with  
1224 mTOR-independent pathway. *Cell Death Dis*.2020;11:46.  
1225 <https://doi.org/10.1038/s41419-020-2246-1>.
- 1226 Wang, Z., X. Xu, J.L. Li, C. Palmer, D. Maric, and J. Dean. Sertoli cell-only  
1227 phenotype and scRNA-seq define PRAMEF12 as a factor essential for  
1228 spermatogenesis in mice. *Nat Commun*.2019;10:5196.  
1229 <https://doi.org/10.1038/s41467-019-13193-3>.

- 1230 Winnik, S., D.S. Gaul, G. Siciliani, C. Lohmann, L. Pasterk, N. Calatayud, J. Weber,  
1231 U. Eriksson, J. Auwerx, L.J. van Tits, T.F. Luscher, and C.M. Matter. Mild  
1232 endothelial dysfunction in Sirt3 knockout mice fed a high-cholesterol diet:  
1233 protective role of a novel C/EBP-beta-dependent feedback regulation of SOD2.  
1234 *Basic Res Cardiol.*2016;111:33. <https://doi.org/10.1007/s00395-016-0552-7>.
- 1235 Yokonishi, T., J. McKey, S. Ide, and B. Capel. Sertoli cell ablation and replacement  
1236 of the spermatogonial niche in mouse. *Nat Commun.*2020;11:40.  
1237 <https://doi.org/10.1038/s41467-019-13879-8>.
- 1238 Yu, H., L. Lin, Z. Zhang, H. Zhang, and H. Hu. Targeting NF-kappaB pathway for  
1239 the therapy of diseases: mechanism and clinical study. *Signal Transduct*  
1240 *Target Ther.*2020;5:209. <https://doi.org/10.1038/s41392-020-00312-6>.
- 1241 Yu, Y., J.C. Fuscoe, C. Zhao, C. Guo, M. Jia, T. Qing, D.I. Bannon, L. Lancashire, W.  
1242 Bao, T. Du, H. Luo, Z. Su, W.D. Jones, C.L. Moland, W.S. Branham, F. Qian,  
1243 B. Ning, Y. Li, H. Hong, L. Guo, N. Mei, T. Shi, K.Y. Wang, R.D. Wolfinger,  
1244 Y. Nikolsky, S.J. Walker, P. Duerksen-Hughes, C.E. Mason, W. Tong, J.  
1245 Thierry-Mieg, D. Thierry-Mieg, L. Shi, and C. Wang. A rat RNA-Seq  
1246 transcriptomic BodyMap across 11 organs and 4 developmental stages. *Nat*  
1247 *Commun.*2014;5:3230. <https://doi.org/10.1038/ncomms4230>.
- 1248 Yue, F., Y. Cheng, A. Breschi, J. Vierstra, W. Wu, T. Ryba, R. Sandstrom, Z. Ma, C.  
1249 Davis, B.D. Pope, Y. Shen, D.D. Pervouchine, S. Djebali, R.E. Thurman, R.  
1250 Kaul, E. Rynes, A. Kirilusha, G.K. Marinov, B.A. Williams, D. Trout, H.  
1251 Amrhein, K. Fisher-Aylor, I. Antoshechkin, G. DeSalvo, L.H. See, M. Fastuca,  
1252 J. Drenkow, C. Zaleski, A. Dobin, P. Prieto, J. Lagarde, G. Bussotti, A. Tanzer,  
1253 O. Denas, K. Li, M.A. Bender, M. Zhang, R. Byron, M.T. Groudine, D.  
1254 McCleary, L. Pham, Z. Ye, S. Kuan, L. Edsall, Y.C. Wu, M.D. Rasmussen,  
1255 M.S. Bansal, M. Kellis, C.A. Keller, C.S. Morrissey, T. Mishra, D. Jain, N.  
1256 Dogan, R.S. Harris, P. Cayting, T. Kawli, A.P. Boyle, G. Euskirchen, A.  
1257 Kundaje, S. Lin, Y. Lin, C. Jansen, V.S. Malladi, M.S. Cline, D.T. Erickson,  
1258 V.M. Kirkup, K. Learned, C.A. Sloan, K.R. Rosenbloom, B. Lacerda de Sousa,  
1259 K. Beal, M. Pignatelli, P. Flicek, J. Lian, T. Kahveci, D. Lee, W.J. Kent, M.  
1260 Ramalho Santos, J. Herrero, C. Notredame, A. Johnson, S. Vong, K. Lee, D.  
1261 Bates, F. Neri, M. Diegel, T. Canfield, P.J. Sabo, M.S. Wilken, T.A. Reh, E.  
1262 Giste, A. Shafer, T. Kuttyavin, E. Haugen, D. Dunn, A.P. Reynolds, S. Neph,

1263 R. Humbert, R.S. Hansen, M. De Bruijn, L. Selleri, A. Rudensky, S.  
1264 Josefowicz, R. Samstein, E.E. Eichler, S.H. Orkin, D. Levasseur, T.  
1265 Papayannopoulou, K.H. Chang, A. Skoultchi, S. Gosh, C. Disteche, P.  
1266 Treuting, Y. Wang, M.J. Weiss, G.A. Blobel, X. Cao, S. Zhong, T. Wang, P.J.  
1267 Good, R.F. Lowdon, L.B. Adams, X.Q. Zhou, M.J. Pazin, E.A. Feingold, B.  
1268 Wold, J. Taylor, A. Mortazavi, S.M. Weissman, J.A. Stamatoyannopoulos,  
1269 M.P. Snyder, R. Guigo, T.R. Gingeras, D.M. Gilbert, R.C. Hardison, M.A.  
1270 Beer, B. Ren, and E.C. Mouse. A comparative encyclopedia of DNA elements  
1271 in the mouse genome. *Nature*.2014;515:355-364.  
1272 <https://doi.org/10.1038/nature13992>.  
1273 Zhai, M., B. Li, W. Duan, L. Jing, B. Zhang, M. Zhang, L. Yu, Z. Liu, B. Yu, K. Ren,  
1274 E. Gao, Y. Yang, H. Liang, Z. Jin, and S. Yu. Melatonin ameliorates  
1275 myocardial ischemia reperfusion injury through SIRT3-dependent regulation  
1276 of oxidative stress and apoptosis. *J Pineal Res*.2017;63.  
1277 <https://doi.org/10.1111/jpi.12419>.  
1278 Zhang, M., J. Lin, S. Wang, Z. Cheng, J. Hu, T. Wang, W. Man, T. Yin, W. Guo, E.  
1279 Gao, R.J. Reiter, H. Wang, and D. Sun. Melatonin protects against diabetic  
1280 cardiomyopathy through Mst1/Sirt3 signaling. *J Pineal Res*.2017;63.  
1281 <https://doi.org/10.1111/jpi.12418>.  
1282

地址: 武汉市航空路 13 号 邮编: 430030  
Address: 13 Hangkong Road, Wuhan, 430030

电话和传真: 027-83692751  
Telephone & Fax: 027-83692751

**华中科技大学同济医学院实验动物伦理委员会审批报告**  
**The Institutional Animal Care and Use Committee at Tongji Medical College,**  
**Huazhong University of Science and Technology**

[2018] 伦审字 (S2061) 号  
[2018] IACUC Number: 2061

|                                                                                                                                                                                                                                                                                                                                                                                                                                                                                                                                                                                                                         |                                                                                                           |                                          |                                |
|-------------------------------------------------------------------------------------------------------------------------------------------------------------------------------------------------------------------------------------------------------------------------------------------------------------------------------------------------------------------------------------------------------------------------------------------------------------------------------------------------------------------------------------------------------------------------------------------------------------------------|-----------------------------------------------------------------------------------------------------------|------------------------------------------|--------------------------------|
| 项目名称<br>Title of Project                                                                                                                                                                                                                                                                                                                                                                                                                                                                                                                                                                                                | The crosstalk of autophagy and apoptosis in cadmium-induced injury/recovery of male reproduction          |                                          |                                |
| 申请单位<br>Application Institute                                                                                                                                                                                                                                                                                                                                                                                                                                                                                                                                                                                           | Family Planning Research Institute, Tongji Medical College, Huazhong University of Science and Technology |                                          |                                |
| 项目负责人<br>Principal Investigator                                                                                                                                                                                                                                                                                                                                                                                                                                                                                                                                                                                         | Ping Su                                                                                                   | 职称<br>Title                              | Associate Professor            |
| 报送资料<br>Material submitted                                                                                                                                                                                                                                                                                                                                                                                                                                                                                                                                                                                              | 课题研究方案<br>Research Plan                                                                                   | 有 <input checked="" type="checkbox"/>    | 无 <input type="checkbox"/>     |
|                                                                                                                                                                                                                                                                                                                                                                                                                                                                                                                                                                                                                         | 观察记录表<br>Observational Recording Table                                                                    | 有 <input checked="" type="checkbox"/>    | 无 <input type="checkbox"/>     |
|                                                                                                                                                                                                                                                                                                                                                                                                                                                                                                                                                                                                                         | 研究人员名单<br>List of Researchers                                                                             | 有 <input checked="" type="checkbox"/>    | 无 <input type="checkbox"/>     |
| 审查<br>Censor                                                                                                                                                                                                                                                                                                                                                                                                                                                                                                                                                                                                            | 研究者资格<br>Qualification of Researchers                                                                     | 符合要求 <input checked="" type="checkbox"/> | 不符合要求 <input type="checkbox"/> |
|                                                                                                                                                                                                                                                                                                                                                                                                                                                                                                                                                                                                                         | 课题研究方案<br>Research Plan                                                                                   | 适当 <input checked="" type="checkbox"/>   | 不适当 <input type="checkbox"/>   |
| 有效期<br>Period of Validity                                                                                                                                                                                                                                                                                                                                                                                                                                                                                                                                                                                               | 2018.02.15---2019.03.15                                                                                   |                                          |                                |
| 审评意见:<br>Remarks:<br>本伦理委员会审阅并讨论了上述相关资料, 该课题研究符合《湖北省实验动物管理条例》和《华中科技大学同济医学院实验动物伦理委员会章程》, 经伦理委员会审核, 同意该课题实施。<br>The Tongji Medical College, HUST Institutional Animal Care and Use Committee has reviewed and discussed the above mentioned materials, and accepted the proposal and approve the research plan as described<br><br>华中科技大学同济医学院实验动物伦理委员会<br>Institutional Animal Care and Use Committee<br>Tongji Medical College, Huazhong University of Science and Technology<br><br>负责人签字:<br>Signature: 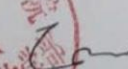<br>批准日期: 年 月 日<br>Date: |                                                                                                           |                                          |                                |

1283
